# Supplementary material for: Fasciola hepatica Gastrodermal Cells Selectively Release Extracellular Vesicles via a Novel Atypical Secretory Mechanism
Source: Int J Mol Sci. 2022 May 15;23(10):5525. doi: 10.3390/ijms23105525 (PMC9143473; doi:10.3390/ijms23105525)
Supplement: Supplementary file 1 [file ijms-23-05525-s001.zip › Table S1.xlsx]

## Sheet: S1A Gastrodermal cell proteins
Table S1A. Proteins identified in the gastrodermal cells of adult F. hepatica and compared with proteins identified in the laser microdissected (LMD) tegument (this study), and previously reported surface, tegument, and excretory/secretory proteins (ESP). A dot indicates a shared protein. R1 – 4 = replicate 1 – 4. 1This study, 2[21], 3[22], 4[17], 5[24].
		Gastrodermal cell unique peptides					Previously detected
Protein	Identifier	R1	R2	R3	R4	LMD tegument1	Surface protein fraction2	Tegument3	Vomitus3	ESP minus vomitus3	Soluble ESP4	15K EVs1, 4	120K EVs4, 5
Proteases and inhibitors
Proteases
Leucine aminopeptidase 2	BN1106_s617B000566	15	11	18	17		●	●	●			●	●
Xaa-Pro dipeptidase (M24 family)	BN1106_s468B000343	6	4	5	13		●		●	●		●	●
Leucine aminopeptidase 2	BN1106_s617B000567	5	4	5	6		●	●	●			●	●
Lysosomal Pro-X carboxypeptidase	BN1106_s1620B000120	5	4	5	3				●	●	●	●	●
Leucine aminopeptidase 1	BN1106_s7079B000034	5	4	4	12		●	●	●			●	●
Cathepsin B6/8	BN1106_s793B000177	5	3	4	5						●	●	●
Cathepsin L1	BN1106_s8490B000026	4	4	5	5		●	●	●	●	●	●	●
Cathepsin L2	BN1106_s8098B000020	3	3	5	7		●	●	●		●	●	●
Natterin-4 (DM9 domain-containing protein)	BN1106_s586B000374	3	3	5	6		●	●				●	●
Cathepsin L1	BN1106_s10332B000010	3	2	3	1		●	●	●	●
Cathepsin L5	BN1106_s4636B000039	2	3	2	5				●	●
Cathepsin B4/5/7	BN1106_s13444B000002	2	2	3	5						●	●	●
Cathepsin L5	BN1106_s6354B000017	2	2	2	2				●	●		●	●
Cysteine protease-related protein	BN1106_s1772B000188	1	2	2	5							●	●
Aspartyl aminopeptidase	BN1106_s2165B000367	1	2	2	4							●
Legumain-like	BN1106_s1861B000097	1	1	3	4				●	●	●	●	●
Mitochondrial processing peptidase	BN1106_s37B000342	1	0	2	2							●
Protease inhibitors
Cystatin-1	BN1106_s4651B000094	4	3	4	7	●	●				●	●	●
Serpin	BN1106_s3864B000104	3	2	5	2	●	●			●		●
FH-KTM kunitz-type proteinase inhibitor	BN1106_s318B000274	2	2	3	2			●	●	●	●		●
FH-KTM kunitz-type proteinase inhibitor	BN1106_s8826B000029	1	2	2	2			●	●	●			●
Metabolism
Malate dismutation
2-oxoglutarate dehydrogenase	BN1106_s425B000529	10	8	8	11	●	●	●				●
Succinate dehydrogenase flavoprotein subunit	BN1106_s1501B000239	7	7	10	13	●		●				●
Phosphoenolpyruvate carboxykinase	BN1106_s246B000252	7	5	7	8	●	●	●		●		●
Enolase	BN1106_s3227B000227	7	4	9	8	●	●	●		●	●	●	●
Cytosolic malate dehydrogenase	BN1106_s1459B000183	4	3	3	3	●	●	●				●	●
Malic enzyme	BN1106_s233B000262	3	5	6	5	●	●	●		●		●	●
Fructose-bisphosphate aldolase	BN1106_s1518B000071	3	2	2	6	●	●	●	●	●		●	●
Succinate-Coenzyme A ligase	BN1106_s6083B000078	3	2	2	4		●	●				●
Transketolase	BN1106_s2937B000224	3	2	2	2							●	●
Fructose-bisphosphate aldolase	BN1106_s4469B000065	3	1	2	4	●	●	●	●	●	●	●	●
Succinate-Coenzyme A ligase	BN1106_s5004B000026	2	3	2	4	●	●	●
Succinate dehydrogenase iron-sulphur protein	BN1106_s3430B000064	2	2	3	4		●	●				●
Phosphoglycerate kinase	BN1106_s3033B000087	2	2	2	3		●	●				●	●
Mitochondrial acetate:succinate CoA-transferase	BN1106_s11911B000016	2	2	2	2	●	●	●				●	●
Transaldolase	BN1106_s8460B000014	2	2	1	1							●
Triosephosphate isomerase	BN1106_s3213B000041	2	0	2	6		●	●		●	●	●	●
Mitochondrial acetate:succinate CoA-transferase	BN1106_s3703B000103	1	1	2	3		●	●				●
Dihydrolipoamide dehydrogenase	BN1106_s8157B000032	1	0	2	4		●				●	●
Tricarboxylic acid cycle-related
Glutamate dehydrogenase (NAD(P)+)	BN1106_s5767B000030	9	10	10	15	●	●	●			●	●	●
Glutamate dehydrogenase (NAD(P)+)	BN1106_s8641B000016	4	5	4	7	●	●	●			●	●
Malate dehydrogenase	BN1106_s6797B000034	4	4	3	5	●	●	●				●
Fumarate hydratase class I	BN1106_s436B000498	3	1	3	7		●	●				●
Protein GOT-2.2	BN1106_s4453B000138	2	3	2	4
Kynurenine aminotransferase	BN1106_s2620B000162	2	1	3	5
1-aminocyclopropane-1-carboxylate synthase	BN1106_s1834B000181	2	1	2	0		●
Pyruvate carboxylase	BN1106_s1091B000125	1	0	4	0		●	●
Propionyl-CoA carboxylase alpha chain	BN1106_s1252B000359	0	0	6	2	●	●					●	●
Other mitochondrion-associated proteins
Universal minicircle sequence binding protein	BN1106_s1987B000231	4	5	3	1	●						●
Adenylate kinase	BN1106_s1855B000093	2	0	2	1		●	●				●
ATP:ADP antiporter	BN1106_s297B000426	1	0	2	2		●	●				●
Lipid metabolism
Hydroxyacyl-Coenzyme A dehydrogenase	BN1106_s3104B000160	4	2	3	4			●				●
Leukotriene A4 hydrolase	BN1106_s98B000759	2	1	3	7		●					●	●
Sphingomyelin phosphodiesterase (SMPDL3)	BN1106_s1285B000159	2	1	2	1						●	●	●
Inorganic pyrophosphatase	BN1106_s1848B000328	1	0	3	2		●					●
Neutral sphingomyelinase (SMPD2)	BN1106_s7135B000046	0	2	2	1							●
Aldo-keto reductase	BN1106_s1026B000549	0	2	2	0		●					●
Amino acid metabolism
Methylthioadenosine phosphorylase	BN1106_s547B000278	2	2	3	7						●
Alpha-aminoadipic semialdehyde synthase	BN1106_s771B000469	1	2	3	0		●	●
2-oxoisovalerate dehydrogenase E2 component	BN1106_s2088B000140	4	3	3	7			●			●
2-oxoisovalerate dehydrogenase E1 component	BN1106_s5274B000066	4	1	4	7							●
Asparaginase/glutaminase	BN1106_s1295B000507	1	1	2	2							●
Other metabolic processes
Retinal dehydrogenase 1	BN1106_s645B000322	1	1	2	2		●	●		●		●
Purine nucleoside phosphorylase	BN1106_s683B000339	0	1	2	2		●					●
Cell cycle
Transcriptional regulation
Ebna2 binding protein P100	BN1106_s375B000232	5	4	4	7							●
Four and a half LIM domains protein	BN1106_s1168B000108	3	2	4	3	●	●					●
Heterogeneous nuclear ribonucleoprotein A1	BN1106_s3553B000143	2	3	2	3		●
Histone H2B	BN1106_s8822B000019	2	2	3	2		●	●				●
Heterogeneous nuclear ribonucleoprotein A2	BN1106_s1270B000089	2	2	2	3
Prohibitin	BN1106_s1317B000170	2	2	2	0			●
KH-type splicing regulatory protein	BN1106_s3948B000057	2	1	0	3
Histone H2A	BN1106_s2003B000165	1	1	2	2			●
Splicing factor, arginine/serine-rich	BN1106_s6B000373	1	0	2	2
Cell division cycle and apoptosis regulator protein 1	BN1106_s1139B000359	0	1	3	4
Protein biosynthesis
Elongation factor 2	BN1106_s1739B000159	9	10	12	15		●					●	●
40S ribosomal protein S3	BN1106_s1303B000672	5	2	7	5
Elongation factor 1-alpha	BN1106_s4252B000085	4	5	6	14	●	●	●				●
40S ribosomal protein RPS16	BN1106_s13848B000008	4	2	3	4
60S acidic ribosomal protein P0	BN1106_s2970B000126	4	1	2	5
Small subunit ribosomal protein S18e	BN1106_s1385B000133	3	3	5	5		●
40S ribosomal protein S24	BN1106_s1600B000257	3	1	2	1			●
Ribosomal protein L19	BN1106_s1888B000145	2	2	3	5
60s ribosomal protein L12	BN1106_s5230B000038	2	2	2	5							●
40s ribosomal protein S14	BN1106_s11983B000006	2	2	2	3
40s ribosomal protein S17	BN1106_s1676B000260	2	2	2	2
40S ribosomal protein S21	BN1106_s2398B000171	2	1	3	3		●
60s ribosomal protein L4	BN1106_s5854B000082	2	1	2	7
Ribosomal protein L5	BN1106_s801B000129	2	1	2	2		●
40S ribosomal protein RPS15A	BN1106_s4329B000099	2	1	2	2							●
60S ribosomal protein L23a	BN1106_s2798B000065	2	1	0	5
60S ribosomal protein L10	BN1106_s3175B000175	2	0	2	4		●
Eukaryotic translation elongation factor 1 gamma	BN1106_s1164B000121	1	1	3	4		●	●				●
40S ribosomal protein S4	BN1106_s507B000153	1	1	2	7			●
Ribosomal protein L7a	BN1106_s4248B000039	1	1	2	4
60S ribosomal protein L18a	BN1106_s2662B000418	1	1	2	3
60s ribosomal protein L17	BN1106_s3958B000080	1	1	2	2
40S ribosomal protein S8	BN1106_s446B000198	1	0	3	5			●
60S ribosomal protein L8	BN1106_s1935B000255	1	0	2	3
Nascent polypeptide-associated complex subunit	BN1106_s2014B000189	1	0	2	2							●
Eukaryotic translation elongation factor 1 beta	BN1106_s4543B000079	1	0	2	2		●	●
60S ribosomal protein L26	BN1106_s338B000296	1	0	2	2
60S ribosomal protein L31	BN1106_s13522B000004	0	2	2	1
40S ribosomal protein S10	BN1106_s1026B000539	0	0	3	2							●
Protein modification
Protein disulfide isomerase	BN1106_s4999B000041	6	3	5	10		●	●				●
Aspartate aminotransferase	BN1106_s4453B000140	3	4	4	4			●			●
Peptidyl-prolyl cis-trans isomerase	BN1106_s5284B000043	3	1	2	5		●			●
Oligosaccharyltransferase complex subunit delta	BN1106_s1713B000125	2	3	3	7
Oligosaccharyltransferase complex subunit alpha	BN1106_s1832B000342	2	1	3	5		●	●
Structural proteins
Motor/cytoskeletal
Myosin heavy chain	BN1106_s323B000258	16	12	19	29	●
Paramyosin	BN1106_s1922B000122	8	4	11	21	●
Filamin	BN1106_s296B000186	5	0	5	6	●	●				●
Actin	BN1106_s658B000223	4	4	6	9		●	●		●		●
Filamin-C	BN1106_s1515B000336	4	3	3	5	●						●
Myosin heavy chain	BN1106_s323B000257	3	1	4	5	●	●
Myosin heavy chain	BN1106_s3182B000117	3	0	2	9	●	●					●
Beta-tubulin 4	BN1106_s1153B000359	2	2	3	3		●	●				●
Actin	BN1106_s101B000531	2	2	3	2		●	●		●
Alpha-tubulin 2	BN1106_s925B000543	2	1	2	0		●	●
Talin	BN1106_s149B000360	2	0	2	1
Alpha-actinin sarcomeric	BN1106_s4069B000247	1	2	1	4	●	●	●				●	●
Tropomyosin	BN1106_s647B000405	1	1	5	3		●
Lamin	BN1106_s1106B000091	1	1	2	5
Tropomyosin-2	BN1106_s4130B000080	1	1	1	7	●	●					●
Tubulin beta-3	BN1106_s4860B000047	1	1	0	7		●	●				●
Titin	BN1106_s98B000745	1	0	2	2			●
Cytoskeletal-binding/modifying
Spectrin beta chain, brain 4	BN1106_s4255B000066	7	3	8	8	●	●
Merlin/moesin/ezrin/radixin	BN1106_s1300B000145	6	8	9	18		●	●				●	●
Ezrin-radixin-moesin-binding phosphoprotein 50	BN1106_s1037B000175	4	3	6	6		●					●
Calpain (C02 family)	BN1106_s204B000249	4	0	4	7	●		●				●
Rho GDP-dissociation inhibitor	BN1106_s4672B000098	2	2	3	1		●
Myophilin	BN1106_s3747B000111	2	1	2	3		●	●	●	●
Ras-like GTP-binding protein Rho1	BN1106_s1908B000177	1	2	2	1			●				●	●
Calponin homolog	BN1106_s2140B000163	1	1	4	2	●	●
Translationally controlled tumour protein	BN1106_s17035B000006	3	2	3	5		●					●
Abnormal long morphology protein 1	BN1106_s1644B000226	0	0	2	2
Extracellular matrix/cell adhesion
Heparan sulfate proteoglycan	BN1106_s25B000189	5	3	12	10	●	●				●
Alpha 1 type IIA collagen	BN1106_s849B000266	3	2	4	4	●
Collagen alpha-1(V) chain	BN1106_s457B000392	2	2	2	3	●
Fasciclin-1	BN1106_s100B000380	2	2	2	2
Collagen alpha-1(V) chain	BN1106_s2714B000202	2	0	2	3	●
Fasciclin I-like protein	BN1106_s1922B000120	1	1	3	3	●					●
Collagen alpha-2(I) chain	BN1106_s104B000457	1	1	2	2	●
Collagen alpha-1(V) chain	BN1106_s849B000265	1	0	2	3	●
Cell maintenance
Chaperones
ER calcistorin	BN1106_s2763B000063	10	5	7	9		●	●			●	●
Heat shock protein 70	BN1106_s309B000234	7	6	8	10	●	●	●		●		●	●
Major egg antigen (P40)	BN1106_s369B000200	6	3	5	6	●						●
Mortalin	BN1106_s2487B000188	5	5	10	14	●	●
Chaperonin GroEL	BN1106_s4703B000071	4	3	6	9	●	●	●				●
T-complex protein 1, gamma subunit	BN1106_s746B000284	4	3	1	2		●					●
78 kDa glucose-regulated protein	BN1106_s1147B000259	3	3	4	3			●
T-complex protein 1, theta subunit	BN1106_s1242B000159	3	2	2	7		●					●	●
Heat shock protein 70	BN1106_s2091B000373	3	1	3	6	●	●	●		●		●	●
Endoplasmin	BN1106_s1277B000102	3	1	1	5							●	●
Heat shock protein 90	BN1106_s1320B000236	2	2	4	5	●	●	●		●		●	●
T-complex protein 1, subunit 7 (Eta)	BN1106_s5514B000140	2	2	2	3							●
T-complex protein 1, zeta subunit	BN1106_s3867B000081	2	1	3	3							●
T-complex protein 1, beta subunit	BN1106_s1793B000159	1	1	4	6		●					●
Calnexin	BN1106_s553B000158	1	1	2	3							●
T-complex protein 1, epsilon subunit	BN1106_s3324B000219	1	0	2	4		●					●
Stress-induced-phosphoprotein 1	BN1106_s1094B000139	1	0	2	3		●					●
Hypoxia upregulated 1-related	BN1106_s117B000696	0	0	2	3
Detoxification
Glutathione S-transferase sigma class	BN1106_s1081B000242	4	4	5	6	●	●	●		●	●	●	●
Thioredoxin	BN1106_s4026B000080	3	2	2	3	●	●	●	●	●	●	●	●
Peroxiredoxin	BN1106_s444B000267	3	1	3	4	●	●					●
Peroxiredoxin	BN1106_s1614B000280	2	2	2	2	●	●				●	●	●
Thioredoxin	BN1106_s5618B000057	1	2	2	5		●	●		●
TyrA protein	BN1106_s232B000326	1	1	2	3	●						●
Signal transduction
Signalling
Tyrosine 3-monooxygenase	BN1106_s3172B000053	4	4	6	6	●	●	●				●
14-3-3 epsilon	BN1106_s686B000273	4	2	4	5	●	●	●		●		●
14-3-3 protein beta	BN1106_s3904B000042	2	2	1	3		●	●			●	●	●
Nucleoside diphosphate kinase	BN1106_s344B000191	1	1	2	2		●			●		●
Protein CBR-FTT-2	BN1106_s4074B000042	1	1	2	2			●
Camp-dependent protein kinase type II-alpha	BN1106_s417B000229	1	0	2	3							●	●
Calcium-binding
CaBP4	BN1106_s214B000744	6	4	8	11	●	●	●		●		●	●
22.4 kDa tegument protein	BN1106_s214B000748	4	4	4	4		●	●				●
Tegumental calcium-binding EF-hand protein	BN1106_s214B000742	1	1	2	3	●	●	●		●		●
Ubiquitination pathway
Ubiquitin-activating enzyme E1	BN1106_s5276B000036	1	3	1	6	●	●					●
Ubiquitin-protein ligase BRE1	BN1106_s208B000185	1	1	2	3	●	●					●	●
Secretory pathway
ER/Golgi apparatus-related
Venom allergen-like 11 protein	BN1106_s1956B000118	5	4	5	6							●
Calreticulin	BN1106_s2673B000071	2	1	3	6							●
Transitional endoplasmic reticulum ATPase	BN1106_s5369B000082	2	1	1	2		●					●	●
Preprotein translocase secy subunit Sec61	BN1106_s2995B000137	1	1	2	2
Atlastin-1	BN1106_s3190B000098	0	1	2	2
Vesicle biogenesis and trafficking
Annexin	BN1106_s819B000364	8	8	9	11	●	●	●		●	●	●	●
Annexin	BN1106_s945B000218	4	2	5	8		●	●		●	●	●	●
Coatomer subunit beta	BN1106_s771B000471	3	0	3	2							●
ADP-ribosylation factor 1	BN1106_s4512B000085	2	2	2	2		●					●
SAR1 gene homolog B	BN1106_s1405B000146	2	2	2	0
Coatomer protein complex subunit alpha	BN1106_s649B000500	2	1	2	3							●
Annexin	BN1106_s500B000161	1	3	2	5	●	●	●		●		●	●
Coatomer subunit gamma	BN1106_s5131B000049	1	0	3	7							●
Ras-related protein Rab-11B	BN1106_s844B000259	1	0	3	3			●				●	●
Protein transport protein Sec23A	BN1106_s2174B000116	1	0	2	3							●
Pumps and transporters
Smdr2	BN1106_s274B000296	8	7	12	18						●	●	●
ATP synthase subunit beta	BN1106_s1866B000129	7	5	7	8		●	●				●
ATP synthase subunit alpha	BN1106_s4332B000087	6	6	5	10		●	●		●		●	●
ATP:ADP antiporter	BN1106_s3313B000078	2	2	5	8	●	●					●
V-type H+-transporting ATPase subunit A	BN1106_s2110B000156	2	2	3	4		●					●
Innexin	BN1106_s503B000225	2	2	2	2
Phosphatidylcholine transfer protein	BN1106_s538B000493	2	2	1	2							●	●
Sodium potassium transporting ATPase alpha subunit	BN1106_s521B000167	2	1	1	3		●					●	●
Vacuolar H+-ATPase SFD subunit	BN1106_s2350B000136	1	2	2	2			●				●
Vacuolar ATP synthase subunit e	BN1106_s1399B000513	1	1	2	3			●				●
ATP synthase subunit beta vacuolar	BN1106_s1633B000182	0	0	3	5			●				●
Scavenger proteins
Lipid-binding
High density lipoprotein-binding protein	BN1106_s810B000521	10	9	8	16		●					●
Low-density lipoprotein receptor	BN1106_s2354B000024	4	3	8	3	●					●
Fatty acid binding protein Fh_3	BN1106_s1849B000099	3	2	6	5		●	●				●	●
Low-density lipoprotein receptor	BN1106_s60B000536	2	2	3	3	●					●
Fatty acid binding protein Fh_2	BN1106_s1228B000120	2	1	2	2		●	●			●	●
Iron-binding
Ferritin	BN1106_s3950B000041	2	2	2	3		●	●		●	●	●	●
No attributable function
Uncharacterised protein	BN1106_s378B000167	9	8	8	10	●						●
Uncharacterised protein	BN1106_s1647B000242	4	1	5	4
Uncharacterised protein	BN1106_s487B000135	3	3	4	3	●						●	●
Uncharacterised protein	BN1106_s2053B000154	2	2	5	6	●						●
Uncharacterised protein	BN1106_s1136B000209	2	1	5	6							●
Uncharacterised protein	BN1106_s538B000488	2	1	2	4	●						●
Uncharacterised protein	BN1106_s567B000346	2	1	2	1							●
Uncharacterised protein	BN1106_s306B000260	2	1	2	0
Uncharacterised protein	BN1106_s808B000203	2	0	3	1
Uncharacterised protein	BN1106_s10667B000018	1	2	3	4							●	●
Uncharacterised protein	BN1106_s2196B000154	1	1	3	5							●
Uncharacterised protein	BN1106_s551B000322	1	1	2	5							●
Uncharacterised protein	BN1106_s2296B000150	1	0	4	9							●
Uncharacterised protein	BN1106_s1614B000277	1	0	2	4
Uncharacterised protein	BN1106_s4305B000064	0	0	2	3
Uncharacterised protein	BN1106_s1154B000147	0	0	2	3							●

## Sheet: S1B Tegument proteins
Table S1B. Proteins identified in the laser microdissected (LMD) tegument of adult F. hepatica and compared with proteins identified in the gastrodermal cells (this study), and previously reported surface, tegument and excretory/secretory proteins (ESP). A dot indicates a shared protein. Asterisks indicate the proteins which have not been described in the previous F. hepatica tegument proteome da…
		LMD tegument unique peptides					Previously detected
Protein	Identifier	R1	R2	R3	R4	Gastrodermal cells1	Surface protein fraction2	Tegument3	Vomitus3	ESP minus vomitus3	Soluble ESP4	15K EVs1, 4	120K EVs4, 5
Structural proteins
Motor/cytoskeletal
Myosin heavy chain*	BN1106_s323B000258	17	17	23	24	●
Paramyosin*	BN1106_s1922B000122	9	10	9	10	●
Filamin	BN1106_s296B000186	4	3	4	2	●	●				●
Filamin-C*	BN1106_s1515B000336	3	3	2	2	●						●
Myosin heavy chain	BN1106_s323B000257	5	3	2	3	●	●
Myosin heavy chain	BN1106_s3182B000117	8	8	0	3	●	●					●
Alpha-actinin sarcomeric	BN1106_s4069B000247	8	10	3	10	●	●	●				●	●
Tropomyosin-2	BN1106_s4130B000080	1	2	1	5	●	●					●
Actin	BN1106_s2907B000133	4	3	1	3		●	●		●		●	●
Titin	BN1106_s1119B000202	3	2	3	1			●
Myosin regulatory light chain	BN1106_s527B000393	2	0	2	1		●
Dynein heavy chain*	BN1106_s1314B000437	2	2	0	0							●
Dynein light chain	BN1106_s949B000142	2	2	2	2		●	●				●
Dynein light chain	BN1106_s1582B000145	1	2	2	1		●	●				●
Dynein light chain	BN1106_s3147B000076	2	3	2	1		●	●				●
Cytoskeletal-binding/modifying
Spectrin beta chain, brain 4	BN1106_s4255B000066	3	5	2	1	●	●
Calpain (C02 family)	BN1106_s204B000249	8	8	3	2	●		●				●
Calponin homolog	BN1106_s2140B000163	4	4	1	1	●	●
Gelsolin	BN1106_s2349B000191	1	1	3	6		●	●				●	●
Lymphocyte cytosolic protein 1	BN1106_s1403B000129	11	8	8	8		●	●	●	●		●	●
Gelsolin	BN1106_s2349B000188	5	5	3	8		●	●				●	●
Myophilin	BN1106_s3026B000096	2	2	0	0		●	●				●
Adenylyl cyclase-associated protein	BN1106_s4290B000110	2	2	0	0		●					●
Extracellular matrix/cell adhesion
Heparan sulfate proteoglycan	BN1106_s25B000189	4	3	8	3	●	●				●
Alpha 1 type IIA collagen*	BN1106_s849B000266	4	4	4	0	●
Collagen alpha-1(V) chain*	BN1106_s457B000392	3	3	1	2	●
Collagen alpha-1(V) chain*	BN1106_s2714B000202	4	3	3	1	●
Fasciclin I-like protein*	BN1106_s1922B000120	6	5	4	2	●					●
Collagen alpha-2(I) chain*	BN1106_s104B000457	4	3	2	2	●
Collagen alpha-1(V) chain*	BN1106_s849B000265	2	3	3	2	●
Collagen alpha-2(V) chain*	BN1106_s1528B000125	3	3	3	1
Collagen type XV alpha*	BN1106_s26B000447	2	1	2	2
Metabolism
Malate dismutation
2-oxoglutarate dehydrogenase	BN1106_s425B000529	11	11	4	4	●	●	●				●
Succinate dehydrogenase flavoprotein subunit	BN1106_s1501B000239	5	8	3	4	●		●				●
Phosphoenolpyruvate carboxykinase	BN1106_s246B000252	4	3	5	2	●	●	●		●		●
Enolase	BN1106_s3227B000227	5	5	1	2	●	●	●		●	●	●	●
Cytosolic malate dehydrogenase	BN1106_s1459B000183	2	3	3	0	●	●	●				●	●
Malic enzyme	BN1106_s233B000262	8	8	5	2	●	●	●		●		●	●
Fructose-bisphosphate aldolase	BN1106_s1518B000071	3	2	3	1	●	●	●	●	●		●	●
Fructose-bisphosphate aldolase	BN1106_s4469B000065	2	2	2	3	●	●	●	●	●	●	●	●
Succinate-Coenzyme A ligase	BN1106_s5004B000026	2	2	1	0	●	●	●
Mitochondrial acetate:succinate CoA-transferase	BN1106_s11911B000016	2	2	0	1	●	●	●				●
Hexokinase A	BN1106_s175B000200	2	2	1	3			●		●	●	●	●
Glyceraldehyde 3-phosphate dehydrogenase	BN1106_s5174B000030	1	2	2	0		●	●				●	●
Tricarboxylic acid cycle-related
Glutamate dehydrogenase (NAD(P)+)	BN1106_s5767B000030	6	5	5	6	●	●	●			●	●	●
Glutamate dehydrogenase (NAD(P)+)	BN1106_s8641B000016	4	4	3	4	●	●	●			●	●	●
Malate dehydrogenase	BN1106_s6797B000034	1	2	2	2	●	●	●				●
Propionyl-CoA carboxylase alpha chain	BN1106_s1252B000359	12	13	8	12	●	●					●	●
Propionyl-CoA carboxylase beta chain	BN1106_s1551B000468	9	10	3	8		●	●				●	●
Mut protein*	BN1106_s3452B000178	5	5	6	7							●
NAD(P) transhydrogenase	BN1106_s2286B000106	1	2	3	1		●	●				●
Other mitochondrion-associated proteins
Universal minicircle sequence binding protein*	BN1106_s1987B000231	2	2	3	0	●						●
Phosphate carrier protein, mitochondrial	BN1106_s115B000512	2	2	1	1		●					●
Stomatin-like protein*	BN1106_s1304B000099	2	2	0	0							●
Amino acid metabolism
Ornithine aminotransferase	BN1106_s398B000241	3	4	1	3		●	●			●
Retinol metabolism
Retinol dehydrogenase*	BN1106_s2277B000049	2	3	1	1							●	●
Retinol dehydrogenase*	BN1106_s2507B000140	2	2	0	0							●
Cell maintenance
Chaperones
Heat shock protein 70	BN1106_s309B000234	4	4	3	3	●	●	●		●		●	●
Major egg antigen (P40)*	BN1106_s369B000200	5	4	3	4	●						●
Mortalin	BN1106_s2487B000188	2	4	3	3	●	●
Chaperonin GroEL	BN1106_s4703B000071	2	3	1	1	●	●	●				●
Heat shock protein 70	BN1106_s2091B000373	4	3	1	1	●	●	●		●		●	●
Heat shock protein 90	BN1106_s1320B000236	2	1	1	2	●	●	●		●		●	●
Detoxification
Glutathione S-transferase sigma class	BN1106_s1081B000242	3	3	3	2	●	●	●		●	●	●	●
Thioredoxin	BN1106_s4026B000080	2	3	2	1	●	●	●	●	●	●	●	●
Peroxiredoxin	BN1106_s444B000267	3	3	1	3	●	●					●
Peroxiredoxin	BN1106_s1614B000280	2	2	2	1	●	●				●	●	●
TyrA protein*	BN1106_s232B000326	3	2	0	1	●						●
Signal transduction
Signalling
Tyrosine 3-monooxygenase	BN1106_s3172B000053	2	2	2	1	●	●	●				●
14-3-3 epsilon	BN1106_s686B000273	2	3	1	0	●	●	●		●		●
cAMP-dependent protein kinase*	BN1106_s2316B000078	2	2	0	3							●
Bcl-2 homologous antagonist	BN1106_s5167B000050	2	2	0	1		●
Calcium-binding
CaBP4	BN1106_s214B000744	3	5	4	7	●	●	●		●		●	●
Tegumental calcium-binding EF-hand protein	BN1106_s214B000742	2	2	3	2	●	●	●		●		●
Tegumental calcium-binding EF-hand protein	BN1106_s214B000741	2	2	0	1		●	●				●
Calmodulin-like protein 2	BN1106_s2277B000048	2	3	2	5		●	●		●		●
Ubiquitination pathway
Ubiquitin-activating enzyme E1	BN1106_s5276B000036	2	2	1	2	●	●					●
Ubiquitin-protein ligase BRE1	BN1106_s208B000185	3	2	1	1	●	●					●	●
Vesicle biogenesis and trafficking
Annexin	BN1106_s819B000364	5	3	5	2	●	●	●		●	●	●	●
Annexin	BN1106_s500B000161	3	3	2	1	●	●	●		●		●	●
SH3-domain GRB2-like endophilin B	BN1106_s335B000427	3	2	3	2		●	●				●	●
CD59-like	BN1106_s63B000399	2	2	2	1			●				●
Transcriptional regulation and protein biosynthesis
Four and a half LIM domains protein	BN1106_s1168B000108	3	3	3	1	●	●					●
Elongation factor 1-alpha	BN1106_s4252B000085	2	1	4	2	●	●	●				●
Pumps and transporters
ATP:ADP antiporter	BN1106_s3313B000078	4	5	0	1	●	●					●
Scavenger proteins
Low-density lipoprotein receptor*	BN1106_s2354B000024	2	4	3	1	●					●
Low-density lipoprotein receptor*	BN1106_s60B000536	4	2	0	0	●					●
Myoglobin	BN1106_s284B000288	2	2	1	2		●	●	●	●	●	●
Protease inhibitors
Cystatin-1	BN1106_s4651B000094	2	3	2	0	●	●				●	●	●
Serpin	BN1106_s3864B000104	2	2	0	0	●	●			●		●
No attributable function
Uncharacterised protein	BN1106_s378B000167	14	13	11	11	●						●
Uncharacterised protein	BN1106_s487B000135	5	5	3	4	●						●	●
Uncharacterised protein	BN1106_s2053B000154	15	12	4	9	●						●
Uncharacterised protein	BN1106_s538B000488	3	2	0	1	●						●
Uncharacterised protein	BN1106_s263B000603	3	3	4	1							●	●
Uncharacterised protein	BN1106_s551B000321	3	2	2	2							●	●
Uncharacterised protein	BN1106_s6006B000040	2	3	1	1							●	●
Uncharacterised protein	BN1106_s1074B000200	2	2	2	1							●	●
Uncharacterised protein	BN1106_s4767B000028	2	2	0	1							●	●
Uncharacterised protein	BN1106_s2053B000153	2	2	0	0							●
Uncharacterised protein	BN1106_s6821B000024	2	1	2	0							●	●
Uncharacterised protein	BN1106_s6720B000015	2	1	0	2						●	●	●

## Sheet: S1C Host proteins
Table S1C. Potential host proteins identified in the gastrodermal cells and tegument of adult F. hepatica that matched to Rattus norvegicus gene models .
Protein	Identifier	Gastrodermal cell R1 1	Gastrodermal cell R2	Gastrodermal cell R3	Gastrodermal cell R4	Tegument R1	Tegument R2	Tegument R3	Tegument R4
Actin, cytoplasmic 1 OS=Rattus norvegicus GN=Actb PE=1 SV=1 - [ACTB_RAT]	P60711	7	7	8	15	9	8	6	1
Tubulin alpha-3 chain OS=Rattus norvegicus GN=Tuba3a PE=2 SV=1 - [TBA3_RAT]	Q68FR8	2	2	3	6
Heat shock protein HSP 90-beta OS=Rattus norvegicus GN=Hsp90ab1 PE=1 SV=4 - [HS90B_RAT]	P34058	2	0	2	6
Heat shock-related 70 kDa protein 2 OS=Rattus norvegicus GN=Hspa2 PE=1 SV=2 - [HSP72_RAT]	P14659	2	4	3	0	3	4	3	0
Elongation factor 1-alpha 1 OS=Rattus norvegicus GN=Eef1a1 PE=1 SV=1 - [EF1A1_RAT]	P62630	1	1	1	3	0	0	2	3
Tubulin beta-4B chain OS=Rattus norvegicus GN=Tubb4b PE=1 SV=1 - [TBB4B_RAT]	Q6P9T8	2	3	1	2
ATP synthase subunit beta, mitochondrial OS=Rattus norvegicus GN=Atp5b PE=1 SV=2 - [ATPB_RAT]	P10719	1	2	4	4
Histone H2B type 1 OS=Rattus norvegicus PE=1 SV=2 - [H2B1_RAT]	Q00715	2	2	1	2
Histone H4 OS=Rattus norvegicus GN=Hist1h4b PE=1 SV=2 - [H4_RAT]	P62804	0	1	3	3
Calmodulin OS=Rattus norvegicus GN=Calm1 PE=1 SV=2 - [CALM_RAT]	P62161	0	0	2	2	2	0	0	2
Junction plakoglobin OS=Rattus norvegicus GN=Jup PE=1 SV=1 - [PLAK_RAT]	Q6P0K8	0	0	2	10
Tubulin beta-5 chain OS=Rattus norvegicus GN=Tubb5 PE=1 SV=1 - [TBB5_RAT]	P69897					3	0	0	7
Heat shock protein HSP 90-alpha OS=Rattus norvegicus GN=Hsp90aa1 PE=1 SV=3 - [HS90A_RAT]	P82995					0	2	0	7
