# Supplementary material for: Fasciola hepatica Gastrodermal Cells Selectively Release Extracellular Vesicles via a Novel Atypical Secretory Mechanism
Source: Int J Mol Sci. 2022 May 15;23(10):5525. doi: 10.3390/ijms23105525 (PMC9143473; doi:10.3390/ijms23105525)
Supplement: Supplementary file 1 [file ijms-23-05525-s001.zip › Table S2.xlsx]

## Sheet: Sheet 1
Table S2: Proteins identified in the 15K EVs from adult Fasciola hepatica by mass spectrometry.
		Unique peptides
Protein ID	Description	Mass	15K-1	15K-2	15K-3
BN1106_s1314B000437	Dynein heavy chain 1 cytosolic	493 kDa	158	154	162
BN1106_s3182B000117	Myosin heavy chain, non-muscle;Putative myosin-10 (Myosin heavy chain, nonmuscle IIb)	211 kDa	120	118	121
BN1106_s90B000599	Protein Dnahc1;Dynein heavy chain 1, axonemal	433 kDa	98	181	136
BN1106_s1515B000336	Filamin;Filamin-C	257 kDa	77	61	71
BN1106_s4069B000247	Putative alpha-actinin;Alpha-actinin sarcomeric	97 kDa	63	59	65
BN1106_s3585B000136	Fer-1-related;Myoferlin;Dysferlin isoform 12	126 kDa	63	58	60
BN1106_s3261B000048	Putative otoferlin;Otoferlin	127 kDa	55	51	56
BN1106_s204B000249	Calpain (C02 family)	86 kDa	54	47	50
BN1106_s2471B000098	Multidrug resistance protein 1;Putative multidrug resistance protein 1, 2, 3 (P glycoprotein 1, 2, 3)	129 kDa	51	50	50
BN1106_s1871B000313	Programmed cell death 6-interacting protein	88 kDa	48	43	44
BN1106_s1300B000145	Putative merlin/moesin/ezrin/radixin	65 kDa	44	43	43
BN1106_s274B000296	ATP-binding cassette subfamily B (MDR/TAP) member 1;SMDR2	110 kDa	43	49	45
BN1106_s309B000234	Heat shock 70kDa protein 1/8	71 kDa	41	41	43
BN1106_s2053B000154	Uncharacterized protein	273 kDa	41	24	35
BN1106_s246B000252	Phosphoenolpyruvate carboxykinase 2	69 kDa	40	39	39
BN1106_s2091B000373	Heat shock protein 70 (Hsp70)-4, putative;Heat shock protein 105	91 kDa	40	39	43
BN1106_s2615B000090	Myoferlin;Fer-1-related;Dysferlin	90 kDa	39	37	42
BN1106_s233B000262	Malic enzyme	66 kDa	36	28	35
BN1106_s487B000135	Putative uncharacterized protein	54 kDa	35	31	31
BN1106_s1191B000313	Putative vacuolar protein sorting 26, vps26;von Willebrand factor A domain-containing protein 5A	71 kDa	35	33	36
BN1106_s819B000364	Annexin	40 kDa	34	31	33
BN1106_s5276B000036	Ubiquitin-activating enzyme E1	123 kDa	33	34	35
BN1106_s208B000185	Putative ubiquitin-protein ligase BRE1	87 kDa	33	23	27
BN1106_s175B000200	Hexokinase A	53 kDa	32	31	34
BN1106_s5369B000082	Cell division control protein 48 aaa family protein (Transitional endoplasmic reticulum atpase),putative	68 kDa	32	29	37
BN1106_s1254B000146	Talin-1;Talin-2	245 kDa	32	29	33
BN1106_s3227B000227	Enolase	60 kDa	31	31	33
BN1106_s1252B000359	Propionyl-CoA carboxylase alpha chain	88 kDa	31	25	34
BN1106_s3033B000087	Phosphoglycerate kinase (EC 2.7.2.3)	44 kDa	30	30	29
BN1106_s538B000488	Uncharacterized protein	90 kDa	30	30	24
BN1106_s120B000361	Myosin-XV;Putative myosin XV	150 kDa	30	25	29
BN1106_s980B000151	Restin-like;Dynactin 1	167 kDa	30	21	31
BN1106_s521B000167	Sodium potassium transporting ATPase alpha subunit;SNaK1	102 kDa	29	34	35
BN1106_s3452B000178	Mut protein	80 kDa	29	17	30
BN1106_s449B000179	Uncharacterized protein (Fragment)	176 kDa	29	25	30
BN1106_s4252B000085	Elongation factor 1-alpha	50 kDa	28	27	29
BN1106_s793B000176	Alpha-tubulin 5	63 kDa	28	30	26
BN1106_s1403B000129	Lymphocyte cytosolic protein 1;Fimbrin, putative;Plastin-2	66 kDa	28	22	27
BN1106_s1501B000239	Succinate dehydrogenase [ubiquinone] flavoprotein subunit, mitochondrial	72 kDa	28	27	29
BN1106_s961B000155	Tetratricopeptide repeat protein 39B	84 kDa	28	25	27
BN1106_s2211B000138	Nardilysin (M16 family);Family M16 unassigned peptidase (M16 family)	114 kDa	28	9	30
BN1106_s617B000566	Peptidase M17;Leucine aminopeptidase 2	42 kDa	27	27	28
BN1106_s468B000343	Xaa-Pro dipeptidase (M24 family);Xaa-Pro dipeptidase	56 kDa	27	29	29
BN1106_s3172B000053	Putative tyrosine 3-monooxygenase;14-3-3 protein, putative	28 kDa	27	27	27
BN1106_s605B000204	Rab GDP dissociation inhibitor alpha	53 kDa	27	27	29
BN1106_s425B000529	2-oxoglutarate dehydrogenase;2-oxoglutarate dehydrogenase E1 component	133 kDa	27	29	34
BN1106_s2907B000133	Actin 5C;Actin beta/gamma 1	47 kDa	26	26	29
BN1106_s445B000221	Tektin-3	70 kDa	26	34	30
BN1106_s368B000158	Calpain B	83 kDa	26	24	31
BN1106_s378B000167	Uncharacterized protein	92 kDa	26	11	25
BN1106_s1111B000208	Erythrocyte membrane protein, putative;Microtubule-associated protein 1S	244 kDa	26	17	24
BN1106_s950B000307	Putative multiple pdz domain protein;Multiple PDZ domain protein	161 kDa	26	27	24
BN1106_s520B000257	Uncharacterized protein;Putative flightless-I	206 kDa	26	24	27
BN1106_s1739B000159	Elongation factor 2	86 kDa	25	34	33
BN1106_s2937B000224	Transketolase	68 kDa	25	26	28
BN1106_s3867B000081	Putative chaperonin containing t-complex protein 1, zeta subunit, tcpz	60 kDa	25	20	23
BN1106_s5514B000140	Chaperonin containing TCP1, subunit 7 (Eta)	60 kDa	25	20	25
BN1106_s2264B000347	Formin-homology protein SmDia;Protein diaphanous homolog 2	106 kDa	25	23	28
BN1106_s561B000223	ATP-dependent 6-phosphofructokinase (ATP-PFK) (Phosphofructokinase) (EC 2.7.1.11) (Phosphohexokinase)	96 kDa	25	25	28
BN1106_s403B000429	Synaptotagmin-like protein 4	80 kDa	25	16	20
BN1106_s606B000246	Alpha-1 tubulin	50 kDa	24	32	24
BN1106_s2434B000197	Putative actin-interacting protein 1	67 kDa	24	25	24
BN1106_s1450B000136	uncharacterised	94 kDa	24	22	19
BN1106_s438B000721	Uncharacterized protein	88 kDa	24	22	22
BN1106_s1891B000136	Rho-associated protein kinase 1	120 kDa	24	22	22
BN1106_s4860B000047	Tubulin beta-3	44 kDa	23	26	23
BN1106_s3396B000087	ATP-binding cassette subfamily D (ALD) member 4	55 kDa	23	21	23
BN1106_s2165B000367	Aspartyl aminopeptidase	160 kDa	23	22	24
BN1106_s2441B000158	EF-hand domain-containing family member C2	90 kDa	23	43	34
BN1106_s1793B000159	Chaperonin containing TCP1, subunit 2 (Beta)	58 kDa	23	20	30
BN1106_s2400B000186	Glutamine synthase;Glutamine synthetase bacteria, putative	55 kDa	23	19	24
BN1106_s2349B000191	Gelsolin;Severin	47 kDa	23	20	22
BN1106_s746B000284	Putative chaperonin containing t-complex protein 1, gamma subunit, tcpg	56 kDa	23	19	23
BN1106_s493B000199	Dopey-related;Protein dopey-1 homolog;Protein Dopey1	354 kDa	23	23	31
BN1106_s658B000223	Actin-1, putative	43 kDa	22	25	24
BN1106_s686B000273	14-3-3 protein epsilon;Tyrosine 3-monooxygenase/tryptophan 5-monooxygenase activation protein	29 kDa	22	20	24
BN1106_s2100B000128	EH domain-containing protein 1	39 kDa	22	16	20
BN1106_s771B000467	Putative fatty-acid amide hydrolase;Fatty-acid amide hydrolase 1	64 kDa	22	14	21
BN1106_s3324B000219	Chaperonin containing TCP1, subunit 5 (Epsilon)	60 kDa	22	17	26
BN1106_s1437B000141	Suppressor of K(+) transport growth defect 1;Vacuolar protein sorting-associated protein 4B	45 kDa	22	18	19
BN1106_s2110B000156	V-type H+-transporting ATPase subunit A	65 kDa	22	13	22
BN1106_s495B000228	Heat shock 70 kDa protein cognate 4	70 kDa	22	14	22
BN1106_s2566B000129	Putative vacuolar protein sorting 26, vps26;von Willebrand factor A domain-containing protein 5A	79 kDa	22	19	23
BN1106_s3610B000066	Putative cc2d1b protein;Coiled-coil and C2 domain-containing protein 1A	102 kDa	22	19	20
BN1106_s360B000346	Putative glycerol kinase	56 kDa	21	18	21
BN1106_s1187B000336	Syntaxin-binding protein 1;Syntaxin binding protein-1,2,3, putative	77 kDa	21	17	25
BN1106_s253B000145	Phospholipid-transporting atpase;Phospholipid-translocating ATPase;Putative phospholipid-transporting ATPase IF	106 kDa	21	20	21
BN1106_s3904B000042	14-3-3 protein beta/alpha-1;Tyrosine 3-monooxygenase/tryptophan 5-monooxygenase activation protein	42 kDa	20	21	20
BN1106_s551B000321	Uncharacterized protein	37 kDa	20	17	19
BN1106_s7079B000034	Leucine aminopeptidase;PwLAP aminopeptidase (M17 family)	41 kDa	20	23	22
BN1106_s2349B000188	Gelsolin;Severin	34 kDa	20	16	17
BN1106_s1572B000219	O-sialoglycoprotein endopeptidase	105 kDa	20	16	22
BN1106_s4119B000141	T-complex protein 1 subunit alpha	64 kDa	20	17	21
BN1106_s1242B000159	Putative chaperonin containing t-complex protein 1, theta subunit, tcpq;DNAJ homolog subfamily C member 11;T-complex protein 1 subunit theta	58 kDa	20	18	20
BN1106_s1057B000126	DnaJ-like protein subfamily a member 4;Putative hsp40, subfamily A, members 1,2,4;Heat shock protein 40	45 kDa	20	19	22
BN1106_s823B000216	Retinaldehyde binding protein-related;CRAL-TRIO domain-containing protein C365.01;SJCHGC05717 protein	42 kDa	20	16	18
BN1106_s2505B000147	6-phosphogluconate dehydrogenase, decarboxylating (EC 1.1.1.44)	59 kDa	20	19	20
BN1106_s1518B000071	Fructose-bisphosphate aldolase (EC 4.1.2.13) (Fragment)	48 kDa	20	19	22
BN1106_s3894B000174	Uncharacterized protein	91 kDa	20	31	24
BN1106_s6267B000058	Kinesin heavy chain 1;Kinesin family member 5	69 kDa	20	18	25
BN1106_s12B000465	Long-chain-fatty-acid--CoA ligase 5	77 kDa	20	8	13
BN1106_s4413B000122	Uncharacterized protein	47 kDa	19	22	20
BN1106_s285B000846	Protein LMBR1L;Tubulin alpha-1C chain	41 kDa	19	29	21
BN1106_s4469B000065	Fructose-bisphosphate aldolase (EC 4.1.2.13)	40 kDa	19	19	20
BN1106_s1665B000275	Tubulin alpha;Alpha tubulin-like protein	115 kDa	19	25	20
BN1106_s1320B000236	Heat shock protein 90;90 kDa heat shock protein	69 kDa	19	20	20
BN1106_s1346B000233	;Folliculin;Uncharacterized protein	109 kDa	19	56	40
BN1106_s4290B000110	Adenylyl cyclase-associated protein	51 kDa	19	18	19
BN1106_s3037B000155	Tektin A1;Tektin-4	51 kDa	19	32	23
BN1106_s2407B000104	Endocytosis/signaling protein EHD1, putative;EH domain-containing protein 4;EH domain-containing protein 1	51 kDa	19	21	17
BN1106_s20B000502	Rho GTPase-activating protein 44	133 kDa	19	23	22
BN1106_s1044B000289	Protein Ckap5;Putative microtubule associated protein xmap215;Cytoskeleton-associated protein 5	231 kDa	19	23	25
BN1106_s386B000266	Heat shock cognate 71 kDa protein	69 kDa	19	14	18
BN1106_s649B000500	Coatomer protein complex subunit alpha;Coatomer subunit alpha isoform 2	137 kDa	19	18	22
BN1106_s1551B000468	Propionyl-CoA carboxylase beta chain, mitochondrial-like;	50 kDa	18	12	17
BN1106_s1094B000139	Putative Stress-induced-phosphoprotein 1;Putative heat shock protein 70 (Hsp70)-interacting protein	36 kDa	18	12	22
BN1106_s1314B000438	Dynein heavy chain, cytoplasmic	61 kDa	18	17	16
BN1106_s13034B000002	Dipeptidylpeptidase 3;Dipeptidyl-peptidase III (M49 family)	68 kDa	18	16	18
BN1106_s38B000508	Rhotekin-2	110 kDa	18	10	16
BN1106_s137B000321	Cysteine and glycine-rich protein;Pollen-specific protein SF3;LIM-type zinc finger-containing protein	86 kDa	18	14	15
BN1106_s500B000161	Annexin B2;Annexin A7	40 kDa	17	16	16
BN1106_s2277B000049	Putative Retinol dehydrogenase 11;Retinol dehydrogenase 12;Retinol dehydrogenase 13	38 kDa	17	15	21
BN1106_s214B000744	Tegument antigen;Tegumental calcium-binding EF-hand protein 4;CaBP4	22 kDa	17	13	16
BN1106_s1459B000183	Cytosolic malate dehydrogenase	36 kDa	17	17	18
BN1106_s2697B000090	Putative calpain 4, 6, 7, invertebrate;Leucine-rich repeat-containing protein 23;Axonemal leucine-rich repeat protein	44 kDa	17	17	17
BN1106_s2318B000216	Putative lipid-binding protein;Retinaldehyde binding protein-related;Alpha-tocopherol transfer protein-like	41 kDa	17	14	16
BN1106_s94B000341	Probable ubiquitin carboxyl-terminal hydrolase FAF-X;Ubiquitin-specific peptidase 9X (C19 family)	364 kDa	17	13	21
BN1106_s3104B000157	Ubiquitin-protein ligase,putative;E3 ubiquitin-protein ligase HUWE1	345 kDa	17	18	35
BN1106_s1149B000159	Kinesin light chain	68 kDa	17	10	14
BN1106_s3864B000104	Serpin 7, putative;Serpin B6 (Placental thrombin inhibitor);Leukocyte elastase inhibitor	39 kDa	17	17	17
BN1106_s908B000155	NEM-sensitive fusion protein 2;Putative vesicular-fusion protein nsf;Vesicle-fusing ATPase	78 kDa	17	17	19
BN1106_s626B000339	Atpase, class VI, type 11c, putative;Probable phospholipid-transporting ATPase IF	132 kDa	17	18	17
BN1106_s2053B000153	Uncharacterized protein	156 kDa	17	9	19
BN1106_s3971B000090	;Serine/threonine kinase;Serine/threonine-protein kinase NIM1	58 kDa	17	13	17
BN1106_s5073B000167	26s proteasome regulatory particle subunit,putative;26S proteasome regulatory subunit N1	107 kDa	17	14	19
BN1106_s979B000404	Ubiquitin carboxyl-terminal hydrolase (EC 3.4.19.12)	163 kDa	17	16	21
BN1106_s664B000642	Eukaryotic initiation factor 4A;DEAD box ATP-dependent RNA helicase, putative;ATP-dependent RNA helicase eIF4A	45 kDa	17	9	15
BN1106_s577B000267	Uncharacterized protein	73 kDa	17	7	12
BN1106_s1030B000277	Uncharacterized protein	?	16	22	16
BN1106_s617B000567	Leucine aminopeptidase 2;Putative leucyl aminopeptidase	16 kDa	16	15	16
BN1106_s2082B000218	Fructose-bisphosphate aldolase (EC 4.1.2.13)	37 kDa	16	17	17
BN1106_s1908B000177	Ras-like GTP-binding protein Rho1	22 kDa	16	14	15
BN1106_s1971B000297	4-methyl-5(B-hydroxyethyl)-thiazole monophosphate biosynthesis	19 kDa	16	14	17
BN1106_s937B000522	Putative BTB domain protein 2;BTB/POZ domain-containing protein 1/2	63 kDa	16	23	17
BN1106_s5880B000098	Mastin;Subfamily S1A unassigned peptidase (S01 family)	60 kDa	16	16	20
BN1106_s896B000278	Uncharacterized protein	72 kDa	16	24	20
BN1106_s5767B000030	Glutamate dehydrogenase 1;Glutamate dehydrogenase (NAD(P)+)	35 kDa	16	13	17
BN1106_s1633B000182	ATP synthase subunit beta vacuolar,putative;V-type H+-transporting ATPase subunit B;Vacuolar proton-ATPase B-subunit	64 kDa	16	15	18
BN1106_s2003B000172	Putative Cofilin-1	16 kDa	16	15	13
BN1106_s605B000203	Rab GDP dissociation inhibitor alpha	51 kDa	16	14	19
BN1106_s1727B000096	Serpin B6 (Placental thrombin inhibitor)	34 kDa	16	11	15
BN1106_s1866B000129	ATP synthase subunit beta (EC 3.6.3.14)	56 kDa	16	20	17
BN1106_s3804B000157	Uncharacterized protein	34 kDa	16	15	15
BN1106_s664B000643	Mername-AA248 (C02 family);Calpain-5;	69 kDa	16	10	15
BN1106_s7273B000042	Putative major vault protein	103 kDa	16	7	14
BN1106_s3272B000112	Putative multidrug resistance protein 1, 2, 3 (P glycoprotein 1, 2, 3);ATP-binding cassette subfamily B (MDR/TAP) member 1	48 kDa	16	14	8
BN1106_s1861B000097	Legumain-4/5	48 kDa	15	14	14
BN1106_s440B000223	uncharacterised	19 kDa	15	12	14
BN1106_s2351B000179	Lymphocyte cytosolic protein 1;Plastin-1;Plastin-3;Fimbrin	57 kDa	15	22	19
BN1106_s485B000233	Enolase	54 kDa	15	21	16
BN1106_s1498B000257	Niemann-Pick disease type C1 protein;Niemann-Pick C1 protein	103 kDa	15	20	18
BN1106_s6025B000064	Putative vacuolar protein sorting 26, vps26;von Willebrand factor A domain-containing protein 5A	38 kDa	15	13	15
BN1106_s1819B000120	Cell polarity protein;Serine/threonine-protein kinase PAK 1	28 kDa	15	15	16
BN1106_s3213B000041	Triosephosphate isomerase (EC 5.3.1.1)	28 kDa	15	15	15
BN1106_s1383B000093	Putative Retinol dehydrogenase 11;Putative short chain dehydrogenase	35 kDa	15	12	14
BN1106_s420B000182	Importin beta-3;Putative importin-beta 3;Importin-5	131 kDa	15	21	28
BN1106_s4083B000032	Glycogen debranching enzyme	173 kDa	15	29	24
BN1106_s6573B000067	Peptidyl-prolyl cis-trans isomerase FKBP5	47 kDa	15	8	17
BN1106_s1142B000130	Syntaxin 1A;Putative syntaxin 1a;SJCHGC06025 protein	44 kDa	15	11	13
BN1106_s708B000222	26S proteasome regulatory subunit rpn2,putative;26S proteasome regulatory subunit N2	134 kDa	15	9	17
BN1106_s3874B000159	Actin related protein 2/3 complex, subunit 2;Putative arp2/3;Actin related protein 2/3 complex subunit 2	40 kDa	15	8	13
BN1106_s1630B000272	Capn7 protein;Calpain-7 (C02 family)	67 kDa	15	11	12
BN1106_s376B000607	Rho guanine nucleotide exchange factor 1	113 kDa	15	14	13
BN1106_s1153B000359	Beta-tubulin 4	24 kDa	14	17	17
BN1106_s945B000218	Annexin	54 kDa	14	16	17
BN1106_s4120B000056	Arrestin1;Beta-arrestin	64 kDa	14	26	20
BN1106_s772B000172	Uncharacterized protein	75 kDa	14	24	16
BN1106_s3549B000112	Voltage-dependent anion-selective channel protein 2	30 kDa	14	14	15
BN1106_s1855B000093	Adenylate kinase 1	22 kDa	14	17	14
BN1106_s1568B000271	Putative guanine nucleotide-binding protein beta 1, 4 (G protein beta1, 4)	41 kDa	14	17	15
BN1106_s3353B000056	Synaptotagmin, putative;Synaptotagmin-2	43 kDa	14	12	14
BN1106_s3747B000112	IST1 homolog	32 kDa	14	12	11
BN1106_s2018B000302	T-complex protein 1 subunit delta	37 kDa	14	13	14
BN1106_s2963B000136	BRO1 domain-containing protein BROX	49 kDa	14	14	17
BN1106_s370B000272	Uncharacterized protein	34 kDa	14	11	13
BN1106_s2096B000232	14-3-3 epsilon-like transcript variant 1	29 kDa	14	13	15
BN1106_s3266B000046	Annexin	56 kDa	14	13	15
BN1106_s14B000363	Putative 4.1 G protein;Band 4.1-like protein;SPRY domain containing protein;ATP-dependent RNA helicase DDX1	135 kDa	14	10	9
BN1106_s1307B000310	Transient receptor potential cation channel subfamily M member 2;Transient receptor potential cation channel subfamily M member 4	187 kDa	14	12	12
BN1106_s3233B000189	Uncharacterized protein;Protein asteroid homolog 1	94 kDa	14	9	12
BN1106_s102B000383	Putative Eps8;Eps8-related protein;Epidermal growth factor receptor kinase substrate 8-like protein 1	72 kDa	14	5	11
BN1106_s1444B000095	Dynein light chain 1;Putative dynein light chain	10 kDa	13	12	14
BN1106_s1620B000120	Putative Lysosomal Pro-X carboxypeptidase	56 kDa	13	13	13
BN1106_s1081B000242	Glutathione S-transferase sigma class	27 kDa	13	17	15
BN1106_s1241B000264	Carboxypeptidase C;Cathepsin A (Carboxypeptidase C)	47 kDa	13	15	13
BN1106_s4479B000057	Glutathione S-transferase mu 26	58 kDa	13	13	14
BN1106_s98B000759	Leukotriene A4 hydrolase (M01 family)	60 kDa	13	15	19
BN1106_s8038B000016	uncharacterised	?	13	11	11
BN1106_s4026B000080	Thioredoxin	12 kDa	13	12	12
BN1106_s2572B000071	Rab-protein 10	23 kDa	13	12	12
BN1106_s50B000678	Glutathione S-transferase omega-1	25 kDa	13	12	12
BN1106_s1228B000120	Fatty acid binding protein Fh_2	22 kDa	13	11	10
BN1106_s4862B000066	;Putative vacuolar proton atpases;V-type H+-transporting ATPase subunit I	70 kDa	13	12	13
BN1106_s4811B000069	uncharacterised	34 kDa	13	10	9
BN1106_s4802B000087	Mitochondrial import receptor subunit TOM34;Putative heat shock protein 70 (Hsp70)-interacting protein	40 kDa	13	9	13
BN1106_s4233B000074	ADP-ribosylation factor 5;ADP-ribosylation factor 1	20 kDa	13	12	11
BN1106_s1581B000120	Anoctamin	84 kDa	13	12	12
BN1106_s3590B000078	FERM domain-containing protein, putative;4.1 G protein, putative	118 kDa	13	18	12
BN1106_s2074B000089	Adenosinetriphosphatase;Dynein light intermediate chain, putative;Cytoplasmic dynein 1 light intermediate chain 2	55 kDa	13	14	14
BN1106_s1037B000175	Ezrin-radixin-moesin-binding phosphoprotein 50;Na(+)/H(+) exchange regulatory cofactor NHE-RF2	21 kDa	13	13	11
BN1106_s1164B000121	Eukaryotic translation elongation factor 1 gamma;Elongation factor 1-gamma	48 kDa	13	10	13
BN1106_s571B000485	Cytoplasmic dynein intermediate chain 2, (Dhic-2), putative	64 kDa	13	11	13
BN1106_s986B000163	Activator of 90 kDa heat shock protein ATPase homolog 1	45 kDa	13	12	12
BN1106_s1801B000121	uncharacterised	46 kDa	13	22	17
BN1106_s1059B000313	Protein Ankdd1b;Ankyrin repeat and death domain-containing protein 1A	95 kDa	13	15	12
BN1106_s5766B000064	Protein kinase;STE20-like serine/threonine-protein kinase	55 kDa	13	12	13
BN1106_s2316B000078	cAMP-dependent protein kinase regulatory subunit;Camp-dependent protein kinase type II-alpha regulatory subunit, putative	47 kDa	13	7	14
BN1106_s1004B000205	Putative coatomer beta subunit;Coatomer subunit beta	114 kDa	13	13	17
BN1106_s4027B000178	Putative peptide n-glycanase (Pngase);Peptide-N4-(N-acetyl-beta-glucosaminyl) asparagine amidase	95 kDa	13	7	11
BN1106_s1614B000280	Peroxiredoxin	17 kDa	12	12	11
BN1106_s584B000350	Solute carrier family 2 facilitated glucose transporter member 3;Glucose transporter-2 protein	56 kDa	12	13	13
BN1106_s5174B000030	Glyceraldehyde 3-phosphate dehydrogenase	21 kDa	12	11	10
BN1106_s586B000374	Natterin-4;DM9 domain-containing protein;Putative Fasciola/Schistosoma cross-reactive protein	17 kDa	12	16	15
BN1106_s4672B000098	Rho GDP-dissociation inhibitor 2	19 kDa	12	12	12
BN1106_s10348B000022	Glutathione peroxidase	?	12	11	11
BN1106_s2639B000141	uncharacterised	57 kDa	12	21	14
BN1106_s769B000142	L-lactate dehydrogenase (EC 1.1.1.27)	36 kDa	12	12	13
BN1106_s6323B000016	Putative ef-hand domain (C-terminal) containing protein	45 kDa	12	17	16
BN1106_s844B000259	Ras-related protein Rab-11B, putative	24 kDa	12	12	12
BN1106_s3313B000078	ATP:ADP antiporter	34 kDa	12	12	14
BN1106_s2399B000141	Kinesin heavy chain 1	38 kDa	12	10	12
BN1106_s819B000365	Annexin	32 kDa	12	13	12
BN1106_s4047B000060	Glycerol-3-phosphate dehydrogenase 1	37 kDa	12	14	11
BN1106_s6032B000034	Telomerase protein component 1	62 kDa	12	9	11
BN1106_s306B000267	Telomerase protein component 1	56 kDa	12	10	13
BN1106_s284B000287	Globin-3;Myoglobin 2	18 kDa	12	9	8
BN1106_s789B000476	3bp-1 related rhogap;SH3 domain-binding protein 1	76 kDa	12	13	16
BN1106_s3595B000059	Glutathione S-transferase mu 29	46 kDa	12	12	13
BN1106_s2351B000181	Putative spectrin beta chain, brain 3 (Spectrin, non-erythroid beta chain 3) (Beta-IV spectrin)	259 kDa	12	3	16
BN1106_s878B000298	Putative membrane traffic protein;Antigen EM13;Putative adaptor protein pacsin	54 kDa	12	7	10
BN1106_s2100B000129	Endocytosis/signaling protein EHD1, putative	28 kDa	12	10	11
BN1106_s214B000747	Tegumental calcium-binding EF-hand protein 3;CaBP3	25 kDa	12	5	10
BN1106_s79B000381	Ubiquitin carboxyl-terminal hydrolase 5-like protein 2	52 kDa	12	13	14
BN1106_s5131B000049	Coatomer subunit gamma	100 kDa	12	8	12
BN1106_s3352B000154	Dynactin subunit 4;Putative dynactin P62 subunit	66 kDa	12	5	10
BN1106_s435B000242	Putative phospholipid-transporting ATPase IIB;Putative cation-transporting ATPase	64 kDa	12	9	10
BN1106_s1783B000131	Myosin-2	91 kDa	12	7	6
BN1106_s793B000177	Cathepsin B6/8	38 kDa	11	12	11
BN1106_s1849B000099	Fatty acid binding protein Fh_3	16 kDa	11	12	13
BN1106_s925B000539	Alpha-tubulin 2	49 kDa	11	11	12
BN1106_s214B000742	Tegument antigen;CaBP4	20 kDa	11	6	9
BN1106_s214B000741	Tegument antigen;CaBP4	22 kDa	11	8	10
BN1106_s4811B000068	uncharacterised	36 kDa	11	11	10
BN1106_s2507B000140	Putative Retinol dehydrogenase 11	32 kDa	11	9	11
BN1106_s2296B000150	uncharacterised	43 kDa	11	13	12
BN1106_s1342B000215	Alpha-centractin (Centractin) (Centrosome-associated actin homolog) (Actin-RPV) (ARP1);Actin, putative	40 kDa	11	9	11
BN1106_s115B000512	Phosphate carrier protein, mitochondrial	32 kDa	11	11	10
BN1106_s692B000155	Protein kinase;Calcium/calmodulin-dependent protein kinase II isoform A	65 kDa	11	8	10
BN1106_s214B000745	Tegument antigen;Sm 20.8	25 kDa	11	8	9
BN1106_s2764B000112	Cell polarity protein;MAGUK p55 subfamily member 5	48 kDa	11	12	14
BN1106_s435B000243	Putative phospholipid-transporting ATPase IIB;ATP9A protein	68 kDa	11	12	12
BN1106_s2044B000106	Purine nucleoside phosphorylase	31 kDa	11	14	14
BN1106_s369B000200	Major egg antigen (P40);Putative heat shock protein	53 kDa	11	5	12
BN1106_s4332B000087	ATP synthase subunit alpha	61 kDa	11	14	12
BN1106_s3430B000064	Putative succinate dehydrogenase iron-sulfur protein	29 kDa	11	11	11
BN1106_s2565B000400	F-actin capping protein alpha, putative;Capping protein (Actin filament) muscle Z-line alpha	33 kDa	11	10	9
BN1106_s1055B000506	Dynein light chain LC6, flagellar outer arm	10 kDa	11	6	9
BN1106_s375B000232	Ebna2 binding protein P100, putative;Staphylococcal nuclease domain-containing protein 1	93 kDa	11	13	12
BN1106_s978B000102	Protein phosphatase 1 regulatory subunit 16A;MYPT-75D, isoform B	54 kDa	11	6	11
BN1106_s3345B000120	Acylaminoacyl-peptidase (S09 family)	92 kDa	11	14	17
BN1106_s881B000362	Cullin-associated NEDD8-dissociated protein 2;Cullin-associated NEDD8-dissociated protein 1	59 kDa	11	8	11
BN1106_s129B000845	vasa3n;ATP-dependent RNA helicase DDX3X;DEAD box ATP-dependent RNA helicase, putative	79 kDa	11	8	12
BN1106_s2329B000133	Ras-related protein Rab-2B isoform 1	24 kDa	11	7	12
BN1106_s178B000373	Gamma-soluble NSF attachment protein	40 kDa	11	11	12
BN1106_s1300B000144	Protein EFR3 homolog B;EFR3-like protein A	68 kDa	11	11	13
BN1106_s480B000234	Eps8-related protein;Epidermal growth factor receptor kinase substrate 8-like protein 1	59 kDa	11	7	7
BN1106_s510B000501	Putative 26S proteasome non-ATPase regulatory subunit 11;26S proteasome subunit S9, putative	47 kDa	11	5	10
BN1106_s4174B000078	RAP1B, member of RAS oncogene family;Ras-related protein Rap-1b	20 kDa	11	11	9
BN1106_s1551B000469	Putative gamma-tubulin complex component 3 (Gcp-3);Gamma-tubulin complex component 3 homolog	99 kDa	11	5	7
BN1106_s1285B000159	Acid sphingomyelinase-like phosphodiesterase 3b;Acid sphingomyelinase-like phosphodiesterase 3a	39 kDa	10	11	12
BN1106_s1772B000188	Cathepsin B	57 kDa	10	14	11
BN1106_s189B000725	Synaptotagmin-like protein 4	51 kDa	10	10	10
BN1106_s269B000233	Phosphoglucomutase, putative;Phosphoglucomutase 1	38 kDa	10	15	12
BN1106_s1079B000440	Eukaryotic translation initiation factor 5A	21 kDa	10	12	10
BN1106_s7432B000042	Putative vacuolar protein sorting 26, vps26;von Willebrand factor A domain-containing protein 5A	32 kDa	10	11	12
BN1106_s390B000196	Syntenin-1	31 kDa	10	8	9
BN1106_s3225B000128	Coronin	65 kDa	10	13	12
BN1106_s5264B000027	Putative ef-hand domain (C-terminal) containing protein;EF-hand domain-containing protein 1	49 kDa	10	13	11
BN1106_s3005B000095	Thioredoxin-glutathione reductase;Thioredoxin glutathione reductase	26 kDa	10	9	9
BN1106_s607B000421	Transcription elongation factor B polypeptide 1;Elongation factor SIII p15 subunit	13 kDa	10	9	10
BN1106_s606B000244	Putative uncharacterized protein	44 kDa	10	6	8
BN1106_s4512B000085	ADP-ribosylation factor 1;CRE-ARF-1.2 protein	20 kDa	10	9	11
BN1106_s4840B000058	Otoferlin;Putative otoferlin	42 kDa	10	8	9
BN1106_s417B000229	Camp-dependent protein kinase type II-alpha regulatory subunit, putative;Putative camp-dependent protein kinase r2	36 kDa	10	10	12
BN1106_s5340B000050	GTP-binding nuclear protein Ran	25 kDa	10	9	10
BN1106_s7681B000071	Serine/threonine-protein phosphatase 2A 65 kDa regulatory subunit A alpha isoform	77 kDa	10	7	13
BN1106_s1465B000295	Thyroid hormone receptor interactor 10;Formin binding protein and related proteins	58 kDa	10	7	11
BN1106_s2584B000144	Glutathione synthetase	64 kDa	10	10	12
BN1106_s17035B000006	Translationally controlled tumor protein;Translationally-controlled tumor protein homolog	18 kDa	10	9	8
BN1106_s31B000425	ATP-dependent transporter, putative;Putative transporter abc superfamily	109 kDa	10	10	8
BN1106_s8078B000026	Rab7;Ras-related protein Rab-7a	23 kDa	10	11	10
BN1106_s3375B000064	Fructose-1,6-bisphosphatase-related	27 kDa	10	9	11
BN1106_s488B000416	Putative eukaryotic translation initiation factor 2, subunit 3, structural gene X-linked;Putative eukaryotic translation initiation factor 2 gamma subunit (Eif-2-gamma);Translation initiation factor 2 subunit 3	48 kDa	10	8	8
BN1106_s1228B000119	Fatty acid binding protein Fh_15	31 kDa	10	6	7
BN1106_s768B000174	Putative DEAD box ATP-dependent RNA helicase;ATP-dependent RNA helicase DDX1	52 kDa	10	9	12
BN1106_s2851B000085	SJCHGC03350 protein	18 kDa	10	10	10
BN1106_s1026B000549	Aldo-keto reductase family 1, member B4 (Aldose reductase)	35 kDa	10	6	9
BN1106_s765B000147	Ras-related protein Rap-1b;Ras-related protein rap-1b	20 kDa	10	10	8
BN1106_s931B000220	Putative alanine aminotransferase;Alanine aminotransferase 1	55 kDa	10	7	11
BN1106_s1419B000169	Serine/threonine-protein phosphatase (EC 3.1.3.16)	36 kDa	10	8	11
BN1106_s1407B000292	Prolyl endopeptidase	81 kDa	10	8	11
BN1106_s1237B000190	CDC37 cell division cycle 37 homolog;Cdc37-related	46 kDa	10	5	9
BN1106_s2335B000137	FAD-dependent oxidoreductase;Putative fad oxidoreductase	58 kDa	10	7	9
BN1106_s294B000147	Uncharacterized protein	14 kDa	10	9	9
BN1106_s136B000269	Uncharacterized protein	44 kDa	10	8	12
BN1106_s612B000225	Serine/threonine-protein phosphatase (EC 3.1.3.16)	52 kDa	10	4	7
BN1106_s5689B000026	DM9 domain-containing protein	23 kDa	9	8	9
BN1106_s4651B000094	Cystatin-1;Cystatin-2;Stefin-1;Cystatin-B (Stefin-B)	11 kDa	9	9	9
BN1106_s949B000146	Dynein light chain LC6, flagellar outer arm	12 kDa	9	8	8
BN1106_s263B000603	uncharacterised	13 kDa	9	8	9
BN1106_s1679B000169	Universal stress protein	17 kDa	9	9	9
BN1106_s1026B000543	Universal stress protein;Universal stress protein A-like protein	19 kDa	9	7	8
BN1106_s567B000346	Uncharacterized protein	?	9	7	7
BN1106_s2858B000111	Vacuolar protein sorting-associated protein VTA1-like	31 kDa	9	8	9
BN1106_s171B000376	Vesicle-associated membrane protein 7;IMP25 protein;Synaptobrevin, putative	?	9	8	9
BN1106_s3779B000072	WD repeat-containing protein 16	43 kDa	9	14	11
BN1106_s639B000758	Cation chloride cotransporter, putative;Solute carrier family 12 member 9	113 kDa	9	17	17
BN1106_s666B000203	Uncharacterized protein	?	9	16	10
BN1106_s1007B000177	NEDD4-like E3 ubiquitin-protein ligase WWP1	47 kDa	9	8	12
BN1106_s1251B000326	Uncharacterized protein	82 kDa	9	10	10
BN1106_s216B000184	uncharacterised	37 kDa	9	8	9
BN1106_s8641B000016	Glutamate dehydrogenase (NAD(P)+)	22 kDa	9	9	9
BN1106_s645B000322	Aldehyde dehydrogenase,putative;Retinal dehydrogenase 1	76 kDa	9	10	9
BN1106_s2573B000234	Cytochrome c oxidase subunit IV	25 kDa	9	9	8
BN1106_s8098B000020	cathepsin L2	45 kDa	9	9	10
BN1106_s2835B000195	Putative chromosome region maintenance protein 1/exportin;Exportin-1	121 kDa	9	10	11
BN1106_s181B000525	Cation-transporting ATPase 13A3/4/5	125 kDa	9	6	7
BN1106_s3026B000096	Myophilin;Calponin putative;;Transgelin	17 kDa	9	8	8
BN1106_s3634B000102	3'-phosphoadenosine 5'-phosphosulfate synthase 1;PAPS synthase 2	70 kDa	9	5	13
BN1106_s18772B000008	H+-transporting ATPase;Putative vacuolar proton atpases;V-type H+-transporting ATPase subunit I;Vacuolar H[+] ATPase subunit 100-1	24 kDa	9	9	9
BN1106_s179B000156	Serine/threonine kinase;Serine/threonine protein kinase;Serine/threonine-protein kinase 36	157 kDa	9	11	12
BN1106_s9130B000051	Hydroxyacylglutathione hydrolase;Putative hydroxyacylglutathione hydrolase mitochondrial	28 kDa	9	9	10
BN1106_s29B000536	AP-1 complex subunit beta-1 (Adapter-related protein complex 1 beta-1 subunit)protein complex 1 beta large chain;AP-1 complex subunit beta-1 (Adapter-related protein complex 1 beta-1 subunit)	78 kDa	9	7	10
BN1106_s1295B000507	Putative asparaginase;Asparaginase/glutaminase	?	9	8	7
BN1106_s285B000844	Tubulin, alpha 1c;Tubulin, alpha 6;Tuba6-prov protein	50 kDa	9	18	14
BN1106_s4759B000058	Natterin-4;DM9 domain-containing protein	22 kDa	9	8	7
BN1106_s6447B000109	Serine/threonine kinase;Protein kinase N;Protein kinase C-related kinase	44 kDa	9	9	7
BN1106_s10981B000052	Alpha-soluble NSF attachment protein;Putative soluble NSF attachment protein (SNAP)	29 kDa	9	9	10
BN1106_s617B000558	Heat shock protein 70 (Hsp70)-4, putative	47 kDa	9	4	6
BN1106_s1533B000528	Ubiquinol-cytochrome c reductase cytochrome c1 subunit;Cytochrome C1, putative	41 kDa	9	8	9
BN1106_s1411B000375	Putative rho/rac guanine nucleotide exchange factor;Pleckstrin homology domain-containing family G member 6	83 kDa	9	8	7
BN1106_s1958B000300	Exocyst complex component 1	106 kDa	9	8	8
BN1106_s3715B000086	Carbonyl reductase 1	37 kDa	9	6	7
BN1106_s4981B000066	Proteasome subunit alpha type (EC 3.4.25.1)	23 kDa	9	6	9
BN1106_s2036B000204	Putative rab-18;Ras-related protein Rab-18	24 kDa	9	10	9
BN1106_s282B000337	Tat-binding protein 10;Putative 26s protease regulatory subunit;26S proteasome regulatory subunit T6	48 kDa	9	4	11
BN1106_s3109B000183	Mitogen-activated protein kinase kinase 2;MKK2 protein	44 kDa	9	5	7
BN1106_s1579B000119	20S proteasome subunit alpha 6;Probable cyclin-H	69 kDa	9	8	7
BN1106_s2728B000158	Uncharacterized protein	86 kDa	9	5	10
BN1106_s6447B000108	Predicted protein;Serine/threonine kinase;Protein kinase N	45 kDa	9	6	5
BN1106_s85B000782	Nitrilase homolog 2;Nitrilase superfamily protein;Nitrilase-related;Omega-amidase NIT2	32 kDa	9	7	9
BN1106_s1694B000078	Centaurin-alpha 1 (Putative MAPK-activating protein PM25);Arf-GAP with dual PH domain-containing protein 1	46 kDa	9	7	10
BN1106_s2881B000153	Unc-112-related protein;Fermitin family-like protein 2;Putative mitogen inducible protein product	98 kDa	9	6	5
BN1106_s583B000288	cAMP-dependent protein kinase catalytic subunit	25 kDa	9	5	9
BN1106_s2335B000138	NADH dehydrogenase (Ubiquinone) 1 alpha subcomplex 9;NADH-ubiquinone oxidoreductase 39 kD subunit,putative	47 kDa	9	12	9
BN1106_s2453B000119	PKC-activated phosphatase-1 inhibitor	?	9	6	8
BN1106_s1980B000231	SH3 adapter protein SPIN90 (NCK-interacting protein with SH3 domain)	71 kDa	9	3	9
BN1106_s2277B000048	Calmodulin-like protein 2 (CaM2);Calmodulin-like protein 3	16 kDa	9	6	7
BN1106_s800B000489	cGMP-dependent protein kinase 1;cGMP-dependent protein kinase isozyme 1	98 kDa	9	5	6
BN1106_s122B000261	Serpin B6 (Placental thrombin inhibitor);	25 kDa	9	7	9
BN1106_s7059B000076	Putative lipoxygenase;Arachidonate 5-lipoxygenase;	32 kDa	9	4	7
BN1106_s136B000270	Uncharacterized protein	55 kDa	9	7	8
BN1106_s6821B000024	uncharacterised	38 kDa	8	9	10
BN1106_s344B000191	Nucleoside diphosphate kinase	17 kDa	8	8	8
BN1106_s1008B000098	EF-hand calcium-binding domain-containing protein 6	84 kDa	8	31	19
BN1106_s3147B000076	Dynein light chain 1, cytoplasmic;	12 kDa	8	6	7
BN1106_s1442B000167	Uncharacterized protein	?	8	6	7
BN1106_s1490B000080	Putative amino acid permease F13H10.3	52 kDa	8	7	7
BN1106_s3396B000086	ATP-binding cassette subfamily D (ALD) member 4;Putative atp-binding cassette sub-family d member 4	31 kDa	8	8	9
BN1106_s13444B000002	Cathepsin B4/5/7	12 kDa	8	8	6
BN1106_s912B000169	CRE-VPS-2 protein;Charged multivesicular body protein 2A	26 kDa	8	7	7
BN1106_s1081B000248	Actin depolymerizing factor-like protein;Cofilin	16 kDa	8	8	8
BN1106_s1652B000338	Tektin related;Tektin-B1;Tektin-2	45 kDa	8	13	10
BN1106_s440B000226	uncharacterised	?	8	7	8
BN1106_s739B000132	Putative uncharacterized protein	26 kDa	8	8	7
BN1106_s10326B000017	Secreted saposin-like protein SAP-3	10 kDa	8	10	9
BN1106_s112B001240	Tubulin alpha-2 chain;Alpha tubulin;Tubulin alpha-1 chain	122 kDa	8	16	10
BN1106_s722B000265	;Uncharacterized protein	21 kDa	8	8	7
BN1106_s1639B000396	PRX_like2 domain-containing protein;Prostamide/prostaglandin F synthase	22 kDa	8	9	12
BN1106_s2196B000154	Uncharacterized protein	36 kDa	8	12	9
BN1106_s43B000505	Uncharacterized protein;Pcd6 interacting protein-related	205 kDa	8	14	15
BN1106_s2475B000089	Putative GMP synthase	73 kDa	8	11	13
BN1106_s2242B000188	20S proteasome regulatory subunit beta type PSMB2/PRE1	22 kDa	8	8	8
BN1106_s3536B000079	Uncharacterized protein	28 kDa	8	15	10
BN1106_s547B000278	Methylthioadenosine phosphorylase	34 kDa	8	9	9
BN1106_s81B000696	Putative adp-ribosylglycohydrolase;Poly(ADP-ribose) glycohydrolase ARH3	38 kDa	8	9	10
BN1106_s2316B000077	Chromatin modifying protein 1b;Vacuolar assembly/sorting protein D1D2-like protein	21 kDa	8	8	8
BN1106_s4176B000102	Synaptosomal-associated protein 25;Putative synaptosomal associated protein	27 kDa	8	7	9
BN1106_s3297B000203	Ras-related protein Rab-3B;Rab-protein 8	18 kDa	8	7	8
BN1106_s6770B000051	Proteasome catalytic subunit 3 (T01 family);Proteasome subunit beta type-5	29 kDa	8	11	11
BN1106_s683B000339	Purine nucleoside phosphorylase	37 kDa	8	9	8
BN1106_s11911B000016	Mitochondrial acetate:succinate CoA-transferase	32 kDa	8	6	7
BN1106_s284B000288	Globin-3;Myoglobin 1, putative;Myoglobin 1	13 kDa	8	6	6
BN1106_s1847B000102	Chloride intracellular channel 4	30 kDa	8	6	9
BN1106_s1988B000131	Adenosinetriphosphatase;Dynein light chain LC8-type	11 kDa	8	3	6
BN1106_s1277B000102	Putative endoplasmin;Endoplasmin	371 kDa	8	12	11
BN1106_s3226B000049	Serine protease inhibitor;Serpin;Serpin B;Leukocyte elastase inhibitor	21 kDa	8	6	8
BN1106_s5855B000168	Proteasome beta 1 subunit	22 kDa	8	7	9
BN1106_s1274B000227	Tubulin alpha-3 chain;Alpha tubulin;Alpha-tubulin	50 kDa	8	15	9
BN1106_s1407B000290	Syntaxin binding protein 5;Syntaxin-binding protein 5	153 kDa	8	5	6
BN1106_s1848B000328	Putative inorganic pyrophosphatase;Probable inorganic pyrophosphatase 1	29 kDa	8	8	10
BN1106_s5997B000050	Serine/threonine-protein phosphatase (EC 3.1.3.16)	28 kDa	8	5	9
BN1106_s5583B000078	Tubulin beta 5	67 kDa	8	11	9
BN1106_s1476B000259	Putative wiskott-aldrich syndrome protein;Wiskott-Aldrich syndrome protein	51 kDa	8	4	6
BN1106_s1007B000175	Putative uncharacterized protein	49 kDa	8	7	9
BN1106_s391B000318	Serine/threonine kinase;Putative tao kinase 1	114 kDa	8	7	6
BN1106_s1357B000109	Cytochrome C Oxidase;Cytochrome c oxidase subunit Va	18 kDa	8	7	8
BN1106_s5214B000065	Putative arp2/3 complex 20 kD subunit;Actin related protein 2/3 complex subunit 4	25 kDa	8	8	7
BN1106_s2325B000322	STAM binding protein;Subfamily M67C unassigned peptidase (M67 family)	44 kDa	8	6	7
BN1106_s3094B000169	Putative beta-tubulin cofactor d;Tubulin-specific chaperone D	105 kDa	8	7	14
BN1106_s5103B000076	Acetyl-CoA acetyltransferase	95 kDa	8	5	10
BN1106_s1244B000314	Ras and EF-hand domain-containing protein homolog	50 kDa	8	4	8
BN1106_s1821B000103	Nonsense-mediated mRNA decay protein 1 (Rent1),putative;Regulator of nonsense transcripts 1	82 kDa	8	8	11
BN1106_s973B000182	Autophagy-related protein 9A	96 kDa	8	12	13
BN1106_s321B000299	PI-PLC X domain-containing protein 3	37 kDa	8	5	6
BN1106_s312B000345	Exocyst complex component 2	103 kDa	8	5	10
BN1106_s1227B000341	AMP-activated protein kinase, gamma regulatory subunit, putative	108 kDa	8	5	8
BN1106_s504B000401	26S proteasome subunit ATPase 4	50 kDa	8	4	9
BN1106_s87B000324	Hyaluronidase, putative;Aminopeptidase P homologue (M24 family)	120 kDa	8	7	8
BN1106_s7135B000046	Putative neutral sphingomyelinase	51 kDa	8	4	7
BN1106_s2909B000085	Heat shock 10kD protein 1;Putative groes chaperonin	11 kDa	8	6	5
BN1106_s903B000404	Family S9 non-peptidase homologue (S09 family);Acetylcholinesterase	68 kDa	8	6	6
BN1106_s6006B000040	uncharacterised	19 kDa	7	7	6
BN1106_s4767B000028	uncharacterised	?	7	7	6
BN1106_s8490B000026	Cathepsin L1	53 kDa	7	13	12
BN1106_s3009B000044	Carbonic anhydrase 5B, mitochondrial	42 kDa	7	7	7
BN1106_s227B000504	Putative uncharacterized protein;Protein C4	26 kDa	7	11	10
BN1106_s2296B000149	Ezrin-radixin-moesin-binding phosphoprotein 50;Na(+)/H(+) exchange regulatory cofactor NHE-RF2;	16 kDa	7	8	7
BN1106_s3001B000132	uncharacterised	?	7	6	6
BN1106_s1444B000096	Dynein light chain 1, cytoplasmic	11 kDa	7	6	6
BN1106_s3189B000243	Superoxide dismutase [Cu-Zn] (EC 1.15.1.1)	17 kDa	7	6	6
BN1106_s4361B000046	Pyruvate kinase (EC 2.7.1.40)	64 kDa	7	26	14
BN1106_s739B000131	Putative tegumental protein;Tegumental antigen	17 kDa	7	9	9
BN1106_s1657B000161	Putative tetraspanin-CD63 receptor;Tetraspanin-CD63 receptor	33 kDa	7	5	8
BN1106_s3937B000101	Heat shock protein 90kDa alpha;Heat shock protein 86;	24 kDa	7	8	8
BN1106_s1582B000145	Dynein light chain LC8-type;Dynein light chain 1, cytoplasmic, putative	?	7	5	6
BN1106_s2291B000314	Neuronal nitric oxidse synthase protein inhibitor;Dynein light chain-2	10 kDa	7	8	9
BN1106_s1450B000137	Putative uncharacterized protein	17 kDa	7	8	8
BN1106_s6720B000015	Uncharacterized protein	13 kDa	7	5	6
BN1106_s1111B000205	uncharacterised	46 kDa	7	19	11
BN1106_s160B000168	Tektin-1;Putative tektin	48 kDa	7	20	13
BN1106_s28B000402	Putative tetraspanin-CD63 receptor;Tetraspanin-CD63 receptor	?	7	8	6
BN1106_s7866B000032	Phosphoglycerate mutase	17 kDa	7	7	8
BN1106_s434B000522	Putative thymidylate kinase 251L	68 kDa	7	14	10
BN1106_s3575B000082	Tubulin alpha;Tubulin alpha-3 chain	50 kDa	7	19	11
BN1106_s2985B000113	Reverse transcriptase;Putative rab15, 13, 10, 1, 35, 5, and;Protein argonaute-2	49 kDa	7	7	7
BN1106_s886B000189	Calpain-B;Family C2 unassigned peptidase (C02 family)	44 kDa	7	14	9
BN1106_s1831B000367	Cytosolic nonspecific dipeptidase;Putative metalloexopeptidase	47 kDa	7	9	9
BN1106_s532B000739	Nuclear movement protein nudc, putative;Nuclear migration protein nudC	38 kDa	7	7	9
BN1106_s1912B000186	Capping protein (Actin filament) muscle Z-line beta;F-actin capping protein subunit beta	31 kDa	7	10	10
BN1106_s617B000557	Putative dedicator of cytokinesis protein 1 (DOCK1);Dedicator of cytokinesis protein 1	163 kDa	7	8	9
BN1106_s3950B000041	Putative ferritin	19 kDa	7	5	6
BN1106_s103B000727	Putative quinone oxidoreductase;Synaptic vesicle membrane protein VAT-1 homolog-like	40 kDa	7	6	7
BN1106_s538B000493	Phosphatidylcholine transfer protein-like protein	33 kDa	7	8	7
BN1106_s652B000433	Uncharacterized protein	25 kDa	7	6	9
BN1106_s1959B000206	SJCHGC00698 protein	23 kDa	7	7	8
BN1106_s3509B000140	Putative microtubule-associated protein;Microtubule-associated protein 1	62 kDa	7	4	5
BN1106_s1363B000119	Serine/threonine kinase;Serine/threonine-protein kinase MRCK beta	170 kDa	7	4	5
BN1106_s2329B000135	Suppressor of profilin 2;Actin related protein 2/3 complex subunit 1A/1B	30 kDa	7	7	7
BN1106_s140B000449	CD63 antigen;Sm23, putative	?	7	7	8
BN1106_s2303B000142	Arf6;ADP-ribosylation factor family	20 kDa	7	6	7
BN1106_s460B000226	Flagellar/basal body protein, PACRG family protein	28 kDa	7	12	10
BN1106_s1154B000147	Uncharacterized protein	70 kDa	7	6	8
BN1106_s2234B000252	Putative cationic amino acid transporter;High affinity cationic amino acid transporter 1	77 kDa	7	5	6
BN1106_s3428B000062	Otoferlin;Fer-1-like protein 4	23 kDa	7	8	7
BN1106_s1324B000277	Protein kinase;Serine/threonine-protein kinase ULK4	105 kDa	7	11	7
BN1106_s1757B000125	Pyruvate dehydrogenase E1 component subunit alpha type I mitochondrial	43 kDa	7	10	7
BN1106_s2286B000106	Putative nadp transhydrogenase;NAD(P) transhydrogenase	119 kDa	7	3	10
BN1106_s3923B000103	Ral GTPase-activating protein subunit beta	96 kDa	7	5	7
BN1106_s4740B000062	Syntenin-1;Uncharacterized protein	29 kDa	7	6	5
BN1106_s3452B000179	Actin-like protein 3;Prolyl oligopeptidase (S09 family)	33 kDa	7	7	8
BN1106_s611B000275	Mitogen-activated protein kinase kinase kinase 15	155 kDa	7	8	10
BN1106_s10709B000022	Protein phosphatase 1B	54 kDa	7	5	10
BN1106_s2745B000189	Glyoxalase I;Glyoxalase domain-containing protein 4	30 kDa	7	6	6
BN1106_s13B000572	Protein p25-beta;Tubulin polymerization-promoting protein family member 3	19 kDa	7	8	6
BN1106_s214B000743	Putative 22.6kDa tegument-associated antigen;Tegumental antigen;CaBP4	21 kDa	7	3	5
BN1106_s2763B000063	ER calcistorin;Protein disulfide-isomerase,putative;Protein disulfide-isomerase A1	57 kDa	7	7	11
BN1106_s4370B000169	uncharacterised	12 kDa	7	5	8
BN1106_s915B000136	Putative tetraspanin similiar to uroplakin 1;Tetraspanin;Tetraspanin-1	?	7	6	6
BN1106_s92B000560	T-cell immunomodulatory protein;Itfg1 protein	42 kDa	7	5	6
BN1106_s9961B000006	Cytosol alanyl aminopeptidase (M01 family);Puromycin-sensitive aminopeptidase	30 kDa	7	6	8
BN1106_s5504B000045	26 Kd glutathione-S-transferase, Sm26, putative;Glutathione S-transferase	24 kDa	7	5	7
BN1106_s867B000288	uncharacterised	85 kDa	7	4	6
BN1106_s2489B000362	Putative lysosome-associated membrane glycoprotein;LAMP-1	32 kDa	7	7	6
BN1106_s1639B000395	20S proteasome subunit alpha 3	30 kDa	7	4	6
BN1106_s2174B000116	Protein transport protein Sec23A	95 kDa	7	3	8
BN1106_s6260B000061	Ubiquitin-conjugating enzyme E2 l, putative;Ubiquitin-conjugating enzyme E2 L3	22 kDa	7	4	5
BN1106_s3268B000105	Ataxia telangiectasia mutated family protein;Myoglobin	17 kDa	7	4	6
BN1106_s382B000360	Tryptophanyl-tRNA synthetase;Putative tryptophanyl-tRNA synthetase	36 kDa	7	6	8
BN1106_s727B000100	Four and a half LIM domains protein 3;CBN-ALP-1 protein	13 kDa	7	6	9
BN1106_s516B000294	Putative cullin;Cullin 1	95 kDa	7	5	8
BN1106_s4598B000070	Proteasome (Prosome, macropain) 26S subunit, non-ATPase, 12;Proteasome regulatory subunit-related;26S proteasome regulatory subunit N5	53 kDa	7	4	8
BN1106_s1668B000196	1-alkyl-2-acetylglycerophosphocholine esterase	31 kDa	7	3	8
BN1106_s1029B000154	Glutathione S-transferase omega	34 kDa	7	5	5
BN1106_s4984B000130	Putative map-kinase activating death domain protein;MAP kinase-activating death domain protein	144 kDa	7	5	6
BN1106_s5543B000115	Putative developmentally regulated GTP-binding protein 1 (Drg 1)	37 kDa	7	7	8
BN1106_s300B000251	Ubiquitin carboxyl-terminal hydrolase (EC 3.4.19.12)	49 kDa	7	3	6
BN1106_s3326B000050	Serine/threonine kinase;Protein kinase N;Serine/threonine-protein kinase N2-like protein	33 kDa	7	6	5
BN1106_s1158B000179	Glucose-6-phosphate 1-dehydrogenase (EC 1.1.1.49)	25 kDa	7	4	9
BN1106_s1583B000148	Cell cycle control protein 50A (Transmembrane protein 30A);Cdc50-related	39 kDa	7	4	4
BN1106_s4511B000075	Cytosol alanyl aminopeptidase (M01 family);Puromycin-sensitive aminopeptidase	41 kDa	7	6	6
BN1106_s8350B000044	Thimet oligopeptidase (M03 family);Thimet oligopeptidase	26 kDa	7	6	6
BN1106_s6576B000103	Ubiquitin-60S ribosomal protein L40;Ubiquitin	5 kDa	6	6	6
BN1106_s2677B000056	Putative placenta-specificprotein 8 protein (C15 protein) (Onzin);Cornifelin;PLAC8-like protein 1	16 kDa	6	6	6
BN1106_s4747B000095	Sorcin;Programmed cell death protein, putative;Putative programmed cell death protein	?	6	6	6
BN1106_s5268B000042	Leucine aminopeptidase;Leucine aminopeptidase 1	13 kDa	6	6	6
BN1106_s2527B000096	Outer dynein arm light chain 8;Dynein light chain LC6, flagellar outer arm	10 kDa	6	7	8
BN1106_s986B000164	Elongin B;Putative rna polymerase ii transcription elongation factor elongin/siii subunit elongin b	14 kDa	6	8	9
BN1106_s661B000191	Dynein heavy chain, 3';Dynein heavy chain axonemal	47 kDa	6	14	9
BN1106_s1985B000403	Ectonucleotide pyrophosphatase/phosphodiesterase family member 5	45 kDa	6	7	7
BN1106_s4767B000027	uncharacterised	?	6	6	7
BN1106_s1302B000261	Carbamoyl-phosphate synthase / aspartate carbamoyltransferase / dihydroorotase	210 kDa	6	14	24
BN1106_s758B000544	Uncharacterized protein	46 kDa	6	14	10
BN1106_s676B000138	Branched-chain-amino-acid aminotransferase	43 kDa	6	9	9
BN1106_s418B000293	Venom allergen-like (VAL) 13 protein;Venom allergen-like protein 13	27 kDa	6	6	6
BN1106_s1136B000209	uncharacterised	37 kDa	6	10	10
BN1106_s1139B000356	Uncharacterized protein	28 kDa	6	10	5
BN1106_s4221B000251	Heme-binding protein 2;Putative heme binding protein	?	6	8	9
BN1106_s11916B000010	Putative dnaj homolog subfamily B member 4;DnaJ homolog subfamily B member 4	22 kDa	6	6	7
BN1106_s1901B000239	Importin-7;Putative nuclear transport receptor ranbp7/ranbp8 importin beta superfamily	100 kDa	6	11	14
BN1106_s2203B000132	Ras family-like protein;Psmras1	23 kDa	6	8	6
BN1106_s3547B000116	Sodium/potassium-transporting ATPase beta nervous system antigen 1;ATPase, P-type cation exchange, beta subunit,domain-containing protein	30 kDa	6	8	6
BN1106_s1956B000118	Venom allergen-like (VAL) 11 protein	42 kDa	6	11	11
BN1106_s142B000312	Cellular retinaldehyde-binding/triple function, C-terminal,domain-containing protein	51 kDa	6	8	9
BN1106_s2239B000116	Uncharacterized protein	37 kDa	6	15	10
BN1106_s263B000609	uncharacterised	13 kDa	6	3	5
BN1106_s5169B000151	Putative snare protein ykt6;Synaptobrevin homolog YKT6	18 kDa	6	6	6
BN1106_s1404B000634	Ubiquinol-cytochrome-c reductase complex core protein 2, mitochondrial;Subfamily M16B non-peptidase homologue (M16 family);Cytochrome b-c1 complex subunit 2 mitochondrial	46 kDa	6	8	9
BN1106_s426B000261	E3 ubiquitin-protein ligase HECTD1	383 kDa	6	5	7
BN1106_s1378B000208	Transmembrane protein 55B-B	?	6	8	8
BN1106_s200B000264	Uncharacterized protein	134 kDa	6	6	6
BN1106_s103B000726	Putative quinone oxidoreductase;Synaptic vesicle membrane protein VAT-1 homolog-like	27 kDa	6	4	7
BN1106_s6543B000070	Charged multivesicular body protein 5	24 kDa	6	5	6
BN1106_s531B000172	Putative dihydrolipoamide S-acetyltransferase (E2 component of pyruvate dehydrogenase complex);Thioredoxin-like protein,putative	109 kDa	6	13	6
BN1106_s285B000843	Tubulin alpha-3 chain, putative;Alpha tubulin 6	52 kDa	6	15	7
BN1106_s2896B000173	Cytochrome b5 reductase 1;NADH-cytochrome b5 reductase, putative;	37 kDa	6	6	8
BN1106_s3499B000090	Mitogen-activated protein kinase kinase kinase kinase 5;Serine/threonine kinase;Replication factor C subunit 2	104 kDa	6	6	6
BN1106_s9797B000034	Cubilin	35 kDa	6	4	7
BN1106_s771B000471	Coatomer subunit beta	125 kDa	6	4	9
BN1106_s10435B000022	Phosphoglucomutase, putative;Phosphoglucomutase-1	24 kDa	6	4	3
BN1106_s4445B000034	Leishmanolysin homolog;Putative uncharacterized protein;Leishmanolysin-like peptidase	65 kDa	6	8	9
BN1106_s4722B000062	Putative hepatocyte growth factor-regulated tyrosine kinase substrate (Hgs);Hepatocyte growth factor-regulated tyrosine kinase substrate	37 kDa	6	4	3
BN1106_s5274B000066	2-oxoisovalerate dehydrogenase E1 component alpha subunit;2-oxoisovalerate dehydrogenase subunit alpha, mitochondrial	46 kDa	6	10	6
BN1106_s958B000182	Putative ocrl type II inositol 5-phosphatase;Phosphatidylinositol-bisphosphatase	122 kDa	6	8	10
BN1106_s553B000158	Calnexin;Putative smirv1 protein;Calcium-binding protein Sj66	73 kDa	6	5	8
BN1106_s4703B000071	Heat shock protein 60;Heat shock protein HSP60, putative;	68 kDa	6	3	8
BN1106_s1289B000229	Protein-L-isoaspartate O-methyltransferase domain-containing protein 2;Protein-L-isoaspartate O-methyltransferase domain-containing protein 1	72 kDa	6	5	5
BN1106_s1414B000153	GTPase-activating Rap/Ran-GAP domain-like 1;Ral GTPase-activating protein subunit alpha-2	142 kDa	6	8	10
BN1106_s3104B000160	Hydroxyacyl-Coenzyme A dehydrogenase/3-ketoacyl-Coenzyme A thiolase/enoyl-Coenzyme A hydratase (Trifunctional protein), beta subunit	48 kDa	6	9	7
BN1106_s527B000397	26S proteasome non-ATPase regulatory subunit 5	63 kDa	6	5	8
BN1106_s1048B000163	Calcium binding protein 39;Calcium-binding protein 39-like	38 kDa	6	6	6
BN1106_s1988B000130	Putative uncharacterized protein;NIF3-like protein 1	39 kDa	6	4	6
BN1106_s2879B000106	Sh3-containing grb2-like protein 1 (Endophilin II);Endophilin-A3;	19 kDa	6	4	6
BN1106_s3026B000095	3'(2'), 5'-bisphosphate nucleotidase;Inositol monophosphatase family domain containing protein;Putative pap-inositol-1,4-phosphatase	35 kDa	6	8	8
BN1106_s586B000372	Putative Cofilin-1;Cofilin, actophorin, putative	16 kDa	6	9	7
BN1106_s2014B000189	Putative nascent polypeptide associated complex alpha subunit (Nac alpha);Nascent polypeptide-associated complex subunit alpha muscle-specific form	25 kDa	6	6	5
BN1106_s2487B000187	Uncharacterized protein	39 kDa	6	5	8
BN1106_s224B000256	Delta-aminolevulinic acid dehydratase (EC 4.2.1.24)	37 kDa	6	7	7
BN1106_s1132B000139	Fatty-acid amide hydrolase 1	32 kDa	6	5	6
BN1106_s980B000152	Orotidine 5'-phosphate decarboxylase;Uridine monophosphate synthetase;UMP synthase	53 kDa	6	4	8
BN1106_s1158B000180	Glucose-6-phosphate 1-dehydrogenase (EC 1.1.1.49)	38 kDa	6	6	7
BN1106_s6195B000066	Serine/threonine kinase;Atypical protein kinase C	42 kDa	6	5	6
BN1106_s10667B000018	Uncharacterized protein	11 kDa	6	6	4
BN1106_s1168B000108	LIMPETin;Putative four and A half lim domains;Four and a half LIM domains protein 2	64 kDa	6	5	6
BN1106_s8432B000028	Cullin 3	62 kDa	6	4	6
BN1106_s11016B000012	Growth arrest-specific 2-related;GAS2-like protein 1	29 kDa	6	4	5
BN1106_s2431B000094	DDI1 homolog 2;DNA damage-inducible protein 1;DDI1-like protein 2	47 kDa	6	5	7
BN1106_s931B000221	Ubiquitin-conjugating enzyme E2 O	96 kDa	6	4	5
BN1106_s1170B000182	Phosphomannomutase 2;Phosphomannomutase;	27 kDa	6	5	7
BN1106_s1329B000130	HLA-B-associated transcript 3;Putative scythe/bat3;Large proline-rich protein BAG6	128 kDa	6	3	6
BN1106_s58B000488	Putative cyln2 (Cytoplasmic linker protein-115) (Clip-115);CAP-gly domain-containing linker protein 1	82 kDa	6	5	5
BN1106_s649B000496	Putative hect E3 ubiquitin ligase;E3 ubiquitin-protein ligase HERC4	49 kDa	6	3	8
BN1106_s881B000363	Tip120, putative;Cullin-associated NEDD8-dissociated protein 2	39 kDa	6	7	6
BN1106_s2194B000230	Succinate-CoA ligase;Succinyl-CoA synthetase-related;Succinyl-CoA synthetase alpha subunit	33 kDa	6	4	3
BN1106_s3285B000113	Antigen Sm21.7	17 kDa	6	3	3
BN1106_s3714B000093	Putative lipopolysaccharide-induced transcription factor regulating tumor necrosis factor alpha;Lipopolysaccharide-induced tumor necrosis factor-alpha factor homolog	?	6	3	6
BN1106_s9288B000040	Disco-interacting protein 2 homolog C;Uncharacterized protein	54 kDa	6	6	6
BN1106_s7814B000036	Protein kinase;Integrin-linked protein kinase	28 kDa	6	5	6
BN1106_s925B000542	Putative 26s proteasome non-ATPase regulatory subunit;26S proteasome regulatory subunit N7	45 kDa	6	5	6
BN1106_s1162B000591	Putative 26S proteasome non-ATPase regulatory subunit 7;26S proteasome non-ATPase regulatory subunit 7 (M67 family)	22 kDa	6	3	5
BN1106_s410B000432	Tumor susceptibility protein, putative;Putative tumor susceptibility protein;Putative vacuolar sorting protein/ubiquitin receptor vps23	42 kDa	6	3	5
BN1106_s2926B000084	Hypoxanthine phosphoribosyltransferase 1;Hypoxanthine-guanine phosphoribosyltransferase,putative	18 kDa	6	5	6
BN1106_s1110B000106	uncharacterised	?	6	5	7
BN1106_s784B000193	Neurotracting/lsamp/neurotrimin/obcam related cell adhesion molecule;Active breakpoint cluster region-related protein	16 kDa	6	5	3
BN1106_s1496B000371	Glycolipid transfer protein-like protein;	?	6	4	5
BN1106_s4560B000072	CD63 antigen;Tetraspanin 2B;Tetraspanin 2A	24 kDa	5	5	5
BN1106_s63B000395	Uncharacterized protein	90 kDa	5	13	6
BN1106_s1950B000172	Tektin-2;Putative tektin	51 kDa	5	21	13
BN1106_s426B000263	Tegument antigen;Putative tegumental protein Sm 20.8;Sm 20.8;Tegumental antigen Sm20.8	22 kDa	5	4	7
BN1106_s8173B000028	Trifunctional enzyme subunit alpha, mitochondrial;Enoyl-CoA hydratase / long-chain 3-hydroxyacyl-CoA dehydrogenase	85 kDa	5	10	12
BN1106_s731B000349	Uncharacterized protein	130 kDa	5	13	17
BN1106_s7572B000046	Alpha crystallin-containing small heat shock protein;Major egg antigen	67 kDa	5	15	2
BN1106_s709B000627	Truncated ferritin-like protein;Ferritin-like protein;Yolk ferritin	20 kDa	5	10	4
BN1106_s2655B000264	Chmp1 (Chromatin modifying protein) (Charged multivesicular body protein), putative	21 kDa	5	8	5
BN1106_s2849B000112	uncharacterised	13 kDa	5	6	5
BN1106_s335B000427	SH3-domain GRB2-like endophilin B1	14 kDa	5	6	6
BN1106_s413B000189	Uncharacterized protein	37 kDa	5	10	7
BN1106_s470B000291	Putative heat shock protein;Major egg antigen	29 kDa	5	6	7
BN1106_s810B000521	High-density lipoprotein receptor (Hdl);Vigilin;High density lipoprotein-binding protein (Vigilin)	142 kDa	5	13	11
BN1106_s2124B000372	RAS, putative;Putative ras-related protein;Putative ras-related gtpase l	24 kDa	5	4	4
BN1106_s3732B000092	Uncharacterized protein	12 kDa	5	6	4
BN1106_s1748B000163	Putative uncharacterized protein;Uncharacterized protein	59 kDa	5	5	4
BN1106_s114B000615	uncharacterised	?	5	3	3
BN1106_s637B000246	Ras-related protein Ral-A;Ras-like protein Ral-a	19 kDa	5	5	5
BN1106_s1686B000154	Putative Actin-related protein 2/3 complex subunit 3;Putative arp2/3 complex 21 kD subunit;	23 kDa	5	5	4
BN1106_s1305B000240	Uncharacterized protein	22 kDa	5	6	5
BN1106_s1072B000343	Cytoplasmic fragile X interacting protein;P53 inducible protein-related;Cytoplasmic FMR1 interacting protein	155 kDa	5	4	7
BN1106_s881B000364	Tip120, putative;Cullin-associated NEDD8-dissociated protein 2	47 kDa	5	7	10
BN1106_s483B000264	Receptor expression-enhancing protein 5	14 kDa	5	5	5
BN1106_s613B000174	Traf2 and nck interacting kinase, tnik;Protein kinase;Traf2 and NCK-interacting protein kinase	223 kDa	5	4	5
BN1106_s997B000230	Aminopeptidase P1 (M24 family);Putative xaa-pro aminopeptidase	86 kDa	5	8	9
BN1106_s1061B000223	Thioredoxin-like 2;Glutaredoxin-3;	30 kDa	5	8	6
BN1106_s1843B000275	Uncharacterized protein	158 kDa	5	5	8
BN1106_s2153B000115	Uncharacterized protein	190 kDa	5	3	5
BN1106_s8013B000023	Uridine phosphorylase	24 kDa	5	6	7
BN1106_s982B000289	NADH dehydrogenase (Ubiquinone) Fe-S protein 1;NADH-ubiquinone oxidoreductase 75 kDa subunit	37 kDa	5	8	4
BN1106_s7704B000009	uncharacterised	18 kDa	5	5	5
BN1106_s2778B000109	Serine/threonine-protein phosphatase (EC 3.1.3.16)	19 kDa	5	5	5
BN1106_s4183B000121	Apyrase;Ectonucleoside triphosphate diphosphohydrolase 1;ATP-diphosphohydrolase 1	62 kDa	5	4	6
BN1106_s210B001005	Importin subunit alpha	59 kDa	5	4	4
BN1106_s444B000267	Peroxiredoxin (Alkyl hydroperoxide reductase subunit C);Peroxiredoxin 3;Thioredoxin peroxidase 3	23 kDa	5	6	6
BN1106_s1202B000407	Ubiquitin-conjugating enzyme E2 b;Ubiquitin-conjugating enzyme E2;Putative ubiquitin-conjugating enzyme e2-17 kDa	17 kDa	5	3	5
BN1106_s3446B000159	NADH dehydrogenase (Ubiquinone) flavoprotein 1;NADH dehydrogenase [ubiquinone] flavoprotein 1, mitochondrial isoform 1	53 kDa	5	9	8
BN1106_s4483B000216	Putative l-asparaginase I;60kDa lysophospholipase	51 kDa	5	3	4
BN1106_s848B000726	Scramblase,domain-containing protein;Phospholipid scramblase-related;Phospholipid scramblase 3	?	5	6	4
BN1106_s649B000490	Putative hect E3 ubiquitin ligase;E3 ubiquitin-protein ligase HERC4	40 kDa	5	3	6
BN1106_s1399B000513	V-type H+-transporting ATPase subunit E;Vacuolar ATP synthase subunit E-like protein;ATPase, H+ transporting, lysosomal 31kDa, V1 subunit E	?	5	4	5
BN1106_s577B000269	Plasma membrane calcium-transporting atpase,putative;Ca2+ transporting ATPase plasma membrane	23 kDa	5	3	6
BN1106_s11605B000010	uncharacterised	24 kDa	5	6	6
BN1106_s4533B000071	Phosphatidylinositol-4-phosphate 5-kinase type II, putative;1-phosphatidylinositol-5-phosphate 4-kinase	32 kDa	5	4	5
BN1106_s1123B000529	Nonsense-mediated mRNA decay protein 1 (Rent1),putative;Regulator of nonsense transcripts 1	25 kDa	5	6	6
BN1106_s424B001102	Pyridoxal (Pyridoxine, vitamin B6) kinase;Pyridoxine kinase	26 kDa	5	4	5
BN1106_s5331B000045	LIM, zinc-binding,domain-containing protein;Crp-related;LIM and SH3 domain protein F42H10.3	?	5	4	5
BN1106_s1612B000139	Putative tropinone reductase;3-oxoacyl-[acyl-carrier-protein] reductase;2-deoxy-D-gluconate 3-dehydrogenase	23 kDa	5	6	8
BN1106_s2144B000275	Eps8-related protein	19 kDa	5	6	4
BN1106_s268B000423	IST1 homolog;IST1-like protein	24 kDa	5	4	4
BN1106_s318B000272	Tegumental protein 31.8 kDa;Putative dynein light chain 1, cytoplasmic	?	5	4	4
BN1106_s5369B000081	Transitional endoplasmic reticulum ATPase TER94, putative;Cell division control protein 48 aaa family protein (Transitional endoplasmic reticulum atpase),putative	19 kDa	5	4	4
BN1106_s2623B000088	Uncharacterized protein	15 kDa	5	7	5
BN1106_s378B000162	Gi alpha subunit;Guanine nucleotide-binding protein G(I) alpha	41 kDa	5	5	5
BN1106_s8157B000032	Dihydrolipoamide dehydrogenase	27 kDa	5	4	7
BN1106_s2105B000237	Exocyst complex component 8	73 kDa	5	3	5
BN1106_s2289B000114	Adenine phosphoribosyltransferase, catalyzes the formation of AMP from adenine and 5-phosphoribosylpyrophosphate;Putative adenine phosphoribosyltransferase;Aprt protein	20 kDa	5	6	7
BN1106_s375B000234	Lin-7 homolog B;Lin-7-like proteins	24 kDa	5	7	4
BN1106_s5825B000038	Fatty acid binding protein 3, muscle and heart (Mammary-derived growth inhibitor);Fatty acid-binding protein, heart	18 kDa	5	5	4
BN1106_s632B000553	Serine/threonine-protein phosphatase 6 regulatory subunit 3	110 kDa	5	3	5
BN1106_s3128B000152	ADP-ribosylation factor-like 10, arl10;ADP-ribosylation factor-like protein 8A	21 kDa	5	5	5
BN1106_s3671B000073	uncharacterised	77 kDa	5	5	5
BN1106_s8922B000034	Vacuolar protein sorting-associated protein 25;ESCRT-II complex subunit VPS25	25 kDa	5	6	6
BN1106_s3654B000233	Sorcin;Programmed cell death protein, putative	22 kDa	5	3	4
BN1106_s5674B000038	Uncharacterized protein	48 kDa	5	4	6
BN1106_s7720B000057	Endopeptidase subunit C8;20S proteasome subunit alpha 7;Proteasome subunit alpha 3 (T01 family)	32 kDa	5	3	5
BN1106_s2350B000136	Vacuolar H+-ATPase SFD subunit;Putative vacuolar ATP synthase subunit h	33 kDa	5	4	5
BN1106_s3994B000079	SJCHGC09145 protein;Polyprotein	10 kDa	5	3	5
BN1106_s4130B000080	Tropomyosin-2;Putative tropomyosin;Tropomyosin II isoform 4;Tropomyosin II isoform 7	64 kDa	5	3	7
BN1106_s756B000317	2-oxoglutarate dehydrogenase E2 component;Dihydrolipoamide succinyltransferase	25 kDa	5	3	7
BN1106_s3284B000133	Protein phosphatase 2 (Formerly 2A) regulatory subunit B	35 kDa	5	4	5
BN1106_s42B000590	Cop9 complex subunit, putative;COP9 signalosome complex subunit 4	49 kDa	5	4	8
BN1106_s4513B000138	Thioredoxin 1;Putative thioredoxin-like protein;Thioredoxin-like protein 1;	28 kDa	5	5	5
BN1106_s1127B000153	Putative cyclin fold protein;Cyclin-Y;	34 kDa	5	3	5
BN1106_s2691B000138	Putative dynamin;Dynamin-1	21 kDa	5	4	7
BN1106_s2464B000293	Inositol(Myo)-1(Or 4)-monophosphatase 2;	30 kDa	5	4	5
BN1106_s2980B000187	Eukaryotic translation initiation factor 5;	49 kDa	5	3	6
BN1106_s6536B000041	Fructose-1,6-bisphosphatase	24 kDa	5	3	5
BN1106_s718B000188	Ras suppressor protein 1, rsu1, putative;	31 kDa	5	3	3
BN1106_s2206B000091	Putative dna repair protein xp-E;DNA damage-binding protein 1	63 kDa	5	6	8
BN1106_s284B000286	Estrogen-regulated protein EP45;Serine protease inhibitor	21 kDa	5	4	5
BN1106_s6416B000038	Dynactin subunit 2;Putative dynactin subunit	21 kDa	5	4	5
BN1106_s8460B000014	Transaldolase (EC 2.2.1.2)	24 kDa	5	6	6
BN1106_s90B000600	Caspase 3, apoptosis-related cysteine peptidase;Caspase-3	28 kDa	5	5	4
BN1106_s2018B000301	Myosin-2 essential light chain;Essential myosin light chain	17 kDa	5	3	3
BN1106_s3132B000127	Eukaryotic release factor 3-related (Erfs) (Hbs1-like);Elongation factor 1 alpha-like protein	34 kDa	5	4	5
BN1106_s3194B000068	uncharacterised	11 kDa	5	6	6
BN1106_s7747B000057	Heat shock protein 67B2	19 kDa	5	3	4
BN1106_s2878B000056	Venom allergen-like (VAL) 7 protein	30 kDa	4	3	4
BN1106_s4129B000136	Uncharacterized protein	14 kDa	4	3	3
BN1106_s9271B000022	Thioredoxin-glutathione reductase;Thioredoxin reductase (NADPH)	14 kDa	4	4	5
BN1106_s3249B000086	Enkurin;LOC496000 protein	39 kDa	4	16	8
BN1106_s2829B000128	Uncharacterized protein	98 kDa	4	24	7
BN1106_s4069B000244	Actin-related protein 2-B	27 kDa	4	3	3
BN1106_s3149B000119	Succinate dehydrogenase (Ubiquinone) cytochrome b subunit;Succinate dehydrogenase cytochrome b560 subunit, mitochondrial	23 kDa	4	5	4
BN1106_s5939B000032	Uncharacterized protein;Protein FAM154B	45 kDa	4	13	6
BN1106_s2291B000318	Uncharacterized protein;Cut up, isoform E;Ctp;Similar to Drosophila melanogaster ctp	10 kDa	4	4	4
BN1106_s584B000348	Putative glucose transport protein;Solute carrier family 2 facilitated glucose transporter member 3	58 kDa	4	4	4
BN1106_s508B000664	uncharacterised	41 kDa	4	9	5
BN1106_s5246B000010	uncharacterised	13 kDa	4	4	4
BN1106_s6433B000055	Charged multivesicular body protein 2b;Putative assembly/vacuolar sorting protein	23 kDa	4	3	4
BN1106_s1113B000382	Dynein light chain 1, cytoplasmic, putative;Dynein light chain;Dynein light chain LC8-type	23 kDa	4	3	4
BN1106_s37B000342	Peptidase M16;Putative Mitochondrial processing peptidase beta subunit, mitochondrial	52 kDa	4	8	6
BN1106_s4131B000138	GLIPR1-like protein 1	21 kDa	4	7	5
BN1106_s4998B000033	1-O-acylceramide synthase;Phosphatidylcholine-sterol acyltransferase (Lecithin-cholesterol acyltransferase)/ Phospholipase A;Group XV phospholipase A2	48 kDa	4	4	11
BN1106_s1059B000310	Small GTPase Rac protein 1;Ras-related C3 botulinum toxin substrate 1	15 kDa	4	3	4
BN1106_s1560B000153	CaM3	14 kDa	4	4	5
BN1106_s2949B000195	Microtubule-associated protein RP/EB family member 1;Putative microtubule-associated protein, rp/eb family	20 kDa	4	4	5
BN1106_s1839B000121	Putative calcineurin B subunit;Protein phosphatase 3 regulatory subunit;Calcineurin B-like protein;Protein phosphatase 3, regulatory subunit	25 kDa	4	4	4
BN1106_s2740B000079	Hsp90 co-chaperone (Tebp), putative	22 kDa	4	4	5
BN1106_s3550B000215	Glyceraldehyde 3-phosphate dehydrogenase	37 kDa	4	6	5
BN1106_s678B000118	Calcium-binding protein;Calmodulin-like protein;	17 kDa	4	3	3
BN1106_s1987B000231	Putative universal minicircle sequence binding protein (UMSBP);DNA-binding protein HEXBP	16 kDa	4	4	4
BN1106_s2719B000195	Cathepsin D-like aspartic protease;Cathepsin D	52 kDa	4	7	6
BN1106_s795B000311	Nuclear transport factor 2;Nuclear transport factor 2-like protein	?	4	4	4
BN1106_s1968B000088	Chloride intracellular channel 4;Chloride intracellular channel exc-4;	27 kDa	4	6	6
BN1106_s2593B000233	Vacuolar H ATPase	30 kDa	4	5	6
BN1106_s3198B000149	Disco-interacting protein 2 homolog C;Uncharacterized protein	86 kDa	4	5	4
BN1106_s649B000502	Putative alanyl-tRNA synthetase;Alanyl-tRNA synthetase;Aars protein	54 kDa	4	7	6
BN1106_s6528B000056	;Putative glycyl-tRNA synthetase;Glycyl-tRNA synthetase	66 kDa	4	5	5
BN1106_s364B000261	;Putative uncharacterized protein;Poly(U)-specific endoribonuclease	39 kDa	4	6	5
BN1106_s2810B000146	Putative cullin-2 (Cul-2);Cullin 2	79 kDa	4	5	8
BN1106_s650B000255	Protein phosphatase methylesterase 1 (S33 family)	29 kDa	4	4	8
BN1106_s1605B000240	Putative ubiquitin ligase E3;Ubiquitin ligase E3 alpha-related;	252 kDa	4	3	4
BN1106_s1803B000151	Serologically defined colon cancer antigen 1;Nuclear export mediator factor Nemf	117 kDa	4	7	8
BN1106_s18594B000004	DNA repair protein;Putative uv excision repair protein rad23;UV excision repair protein RAD23 homolog B	39 kDa	4	3	4
BN1106_s1109B000181	Tubulin polymerization-promoting protein family member 3;Tubulin polymerization-promoting protein family member 2	17 kDa	4	4	4
BN1106_s1535B000219	Cul5 protein;Cullin 5	47 kDa	4	5	6
BN1106_s436B000498	Putative fumarate hydratase class I;Pol-related;Fumarate hydratase class I	25 kDa	4	6	4
BN1106_s16157B000010	Asparaginyl-tRNA synthetase;Aspartyl-tRNA synthetase, putative	17 kDa	4	4	5
BN1106_s786B000331	Putative NCK-associated protein 1 isoform 2;NCK-associated protein 1	90 kDa	4	8	5
BN1106_s1784B000459	Ubiquitin conjugating enzyme 13;Ubiquitin conjugating enzyme 13, putative	25 kDa	4	4	4
BN1106_s8194B000020	uncharacterised	18 kDa	4	3	4
BN1106_s1026B000552	Phosphatidylinositol-4-phosphate 5-kinase type II, putative;Phosphatidylinositol-5-phosphate 4-kinase type-2 beta	23 kDa	4	4	4
BN1106_s1807B000157	Glutathione S-transferase zeta class	20 kDa	4	4	4
BN1106_s2071B000147	Uncharacterized protein	15 kDa	4	5	4
BN1106_s527B000392	RuvB-like protein 2;Ruvb-like 2 (Reptin)	59 kDa	4	3	5
BN1106_s699B000198	Thimet oligopeptidase (M03 family);Thimet oligopeptidase	40 kDa	4	5	5
BN1106_s193B000323	Fatty-acid amide hydrolase 1;Vitamin D3 hydroxylase-associated protein;	28 kDa	4	3	3
BN1106_s1582B000144	Cytochrome c oxidase subunit 6B;Cytochrome c oxidase subunit VIb isoform 2	12 kDa	4	5	5
BN1106_s2482B000145	Microsomal glutathione S-transferase;Microsomal GST-1;	15 kDa	4	4	4
BN1106_s2507B000141	Dynein light chain Tctex-type 1 (T-complex testis-specific protein 1 homolog);T-complex-associated-testis-expressed 1-related	11 kDa	4	4	4
BN1106_s4294B000214	Eukaryotic translation initiation factor 2, subunit 1 alpha;Putative eukaryotic translation initiation factor 2 alpha subunit	25 kDa	4	5	4
BN1106_s2001B000142	Putative cytochrome c;Mitochondrial cytochrome c;Cytochrome c proximal	12 kDa	4	3	4
BN1106_s2545B000160	Vacuolar H+ ATPase 44kD C subunit;V-type proton ATPase subunit C 1-A	21 kDa	4	4	6
BN1106_s105B000423	Mucin-like protein;Docking protein 3	45 kDa	4	4	5
BN1106_s1197B000293	Phosphatidylinositol transfer protein alpha isoform	30 kDa	4	3	3
BN1106_s6354B000017	Cathepsin L5	31 kDa	4	4	4
BN1106_s6505B000128	Rho GTPase-activating protein 8	33 kDa	4	4	6
BN1106_s2691B000136	Putative dynamin;Dynamin-1	15 kDa	4	4	3
BN1106_s2949B000194	Microtubule-associated protein RP/EB family member 1	14 kDa	4	4	4
BN1106_s414B000247	Probable calcium-binding protein CML26;Calcium-binding protein;Calmodulin	?	4	3	5
BN1106_s220B000620	Serpin B6 (Placental thrombin inhibitor);Serpin, putative	23 kDa	4	3	4
BN1106_s1000B000617	Putative zeta-coat protein;Putative coatomer protein complex subunit zeta 1;Coatomer subunit zeta-1	?	4	3	5
BN1106_s2238B000283	Brain protein, putative;Brain protein 44	14 kDa	4	5	5
BN1106_s2359B000120	RAB18, member Ras oncogene family;Rab-18, putative;Ras-related protein Rab-18A	23 kDa	4	5	4
BN1106_s4565B000033	Serine protease inhibitor serpin;Leukocyte elastase inhibitor;Serpin	21 kDa	4	3	4
BN1106_s707B000549	Putative xp-G/rad2 DNA repair endonuclease family member	12 kDa	4	4	5
BN1106_s984B000103	Tetratricopeptide repeat protein 29	52 kDa	3	23	11
BN1106_s3779B000073	Putative wd-repeat protein	44 kDa	3	21	11
BN1106_s1865B000185	Solute carrier family 31 (Copper transporters), member 1;Solute carrier family 31 (Copper transporter) member 1	16 kDa	3	4	4
BN1106_s7B000222	Microsomal glutathione transferaseMicrosomal GST-3	?	3	3	3
BN1106_s20469B000004	Niemann-Pick C2 protein;Epididymal secretory protein E1 (Niemann Pick type C2 protein homolog)	12 kDa	3	4	4
BN1106_s1737B000128	70 kDa ribosomal protein S6 kinase;Putative e3 ubiquitin-protein ligase Bre1 (EC 6.3.2.-) (DBre1);	176 kDa	3	3	4
BN1106_s4008B000058	Nucleoside diphosphate kinase;Nucleoside-diphosphate kinase	52 kDa	3	12	7
BN1106_s934B000320	Pyruvate dehydrogenase E1 component, beta subunit;Pyruvate dehydrogenase (Lipoamide)	56 kDa	3	8	3
BN1106_s1326B000429	Putative sodium/solute symporter;Putative sodium-dependent multivitamin transporter	23 kDa	3	3	3
BN1106_s7093B000038	Putative acid phosphatase 6;Cdc50-related;Lysophosphatidic acid phosphatase type 6	20 kDa	3	4	4
BN1106_s414B000242	Similar to 16 kDa calcium-binding protein;Putative calmodulin;Calcium-binding protein	23 kDa	3	3	4
BN1106_s8501B000034	Putative rab5;Ras-related protein Rab-5B	13 kDa	3	3	3
BN1106_s1210B000478	Glycerol-3-phosphate dehydrogenase, putative	85 kDa	3	10	4
BN1106_s1874B000142	Uncharacterized protein	84 kDa	3	4	4
BN1106_s11031B000046	Huntingtin interacting protein 2;Putative ubiquitin-conjugating enzyme E2-25kD	21 kDa	3	5	4
BN1106_s3113B000093	Asna1 protein	39 kDa	3	3	5
BN1106_s678B000120	Putative calmodulin-4 (Calcium-binding protein Dd112);Calcium-binding protein	8 kDa	3	5	4
BN1106_s517B000379	Flotillin 1;Putative flotillin-1	47 kDa	3	9	5
BN1106_s2607B000122	Uncharacterized protein;Sjogren syndrome nuclear autoantigen 1	13 kDa	3	9	5
BN1106_s3938B000088	Tubulin beta-6	49 kDa	3	5	3
BN1106_s2330B000173	Putative g-protein, beta subunit;Guanine nucleotide binding protein (G protein) beta 1;	30 kDa	3	5	5
BN1106_s1854B000110	Lysosomal acid lipase/cholesteryl ester hydrolase	47 kDa	3	5	8
BN1106_s1758B000083	Solute carrier family 22 member 1;Organic cation transporter-like protein;	69 kDa	3	6	3
BN1106_s3441B000084	Lon protease homolog, mitochondrial (EC 3.4.21.-)	119 kDa	3	6	6
BN1106_s5706B000064	E3 ubiquitin-protein ligase HUWE1	91 kDa	3	3	4
BN1106_s211B000337	Putative ubiquitination factor E4a;Ubiquitin conjugation factor E4 A	119 kDa	3	6	5
BN1106_s279B000279	SJCHGC05197 protein	50 kDa	3	6	5
BN1106_s1287B000154	Prostatic acid phosphatase;Acid phosphatase-related;Lysosomal acid phosphatase	54 kDa	3	3	3
BN1106_s1046B000153	Protein Ubr2;E3 ubiquitin-protein ligase UBR2;	220 kDa	3	4	3
BN1106_s3703B000103	Mitochondrial acetate:succinate CoA-transferase;4-hydroxybutyrate coenzyme A transferase;	19 kDa	3	3	3
BN1106_s4700B000064	Exportin-2	107 kDa	3	4	3
BN1106_s8822B000019	Histone H2B	14 kDa	3	5	4
BN1106_s928B000208	Phosphatidylinositol 4-kinase alpha;Phosphatidylinositol 4-kinase	132 kDa	3	4	4
BN1106_s1199B000306	Ankyrin repeat-containing, putative;Probable serine/threonine-protein phosphatase PP2A regulatory subunit;	17 kDa	3	4	6
BN1106_s1842B000207	Mitochondrial inner membrane protein	77 kDa	3	3	6
BN1106_s2074B000090	Adenosinetriphosphatase;Dynein light intermediate chain, putative	19 kDa	3	3	3
BN1106_s4269B000188	Rho GTPase-activating protein 12;Rho GTPase-activating protein 27	49 kDa	3	4	6
BN1106_s3211B000083	Phospholipase D	42 kDa	3	3	4
BN1106_s1155B000117	Uncharacterized protein	22 kDa	3	6	5
BN1106_s1710B000138	Tetratricopeptide repeat protein, tpr, putative;Tetratricopeptide repeat protein 7B	82 kDa	3	5	7
BN1106_s3309B000261	Putative acid phosphatase 6;Putative lysophosphatidic acid phosphatase	8 kDa	3	3	3
BN1106_s2693B000132	ATP synthase gamma subunit;ATP synthase gamma subunit, putative	32 kDa	3	6	4
BN1106_s3318B000068	Putative properdin;Thrombospondin-2	74 kDa	3	5	3
BN1106_s3568B000138	Acid sphingomyelinase-like phosphodiesterase 3b;Acid sphingomyelinase-like phosphodiesterase 3a	?	3	5	5
BN1106_s4969B000147	A disintegrin and metalloprotease domain 8 (Predicted);Putative gamma-tubulin complex component 2 (Gcp-2)	68 kDa	3	4	3
BN1106_s949B000142	Dynein light chain;Putative cut up;Dynein light chain LC8-type	12 kDa	3	3	3
BN1106_s297B000426	ATP:ADP antiporter;Solute carrier family 25 (Mitochondrial adenine nucleotide translocator) member 4/5/6/31	34 kDa	3	9	3
BN1106_s4611B000071	;Putative prefoldin subunit;Prefoldin subunit 5	17 kDa	3	3	3
BN1106_s4067B000100	Ubiquitin-conjugating enzyme E2G 2;Ubiquitin-conjugating enzyme E2 G1	?	3	7	3
BN1106_s4611B000070	Uncharacterized protein	16 kDa	3	5	3
BN1106_s516B000295	Methionine aminopeptidase 2 (MAP 2) (MetAP 2) (EC 3.4.11.18) (Peptidase M)	51 kDa	3	3	4
BN1106_s5245B000187	Uncharacterized protein	26 kDa	3	7	3
BN1106_s11081B000026	G1 to S phase transition protein;Peptide chain release factor subunit 3	56 kDa	3	3	6
BN1106_s1115B000508	Putative uncharacterized protein GLEAN_15547;Ufm1-conjugating enzyme, putative	19 kDa	3	5	5
BN1106_s219B000273	Glucan (1,4-alpha-), branching enzyme 1;Putative starch branching enzyme II;1 4-alpha-glucan branching enzyme	30 kDa	3	4	4
BN1106_s2191B000246	Uncharacterized protein	15 kDa	3	4	5
BN1106_s639B000754	Isochorismatase family protein, putative;Isochorismatase domain-containing protein 2 mitochondrial	23 kDa	3	5	5
BN1106_s7459B000038	Putative oxysterol-binding protein 1;Oxysterol-binding protein 1	29 kDa	3	4	3
BN1106_s1717B000112	Putative rap1 and;Ras-related protein rap-1b;Ras-related protein Rap-2b	21 kDa	3	5	4
BN1106_s2223B000190	Putative threonyl-tRNA synthetase;Threonyl-tRNA synthetase;	74 kDa	3	3	8
BN1106_s1183B000223	cAMP-dependent protein kinase regulatory subunit;Camp-dependent protein kinase type II-alpha regulatory subunit, putative	36 kDa	3	6	3
BN1106_s2088B000140	2-oxoisovalerate dehydrogenase E2 component;Branched-chain alpha-keto acid dihydrolipoyl acyltransferase	23 kDa	3	3	3
BN1106_s502B000345	Uncharacterized protein	64 kDa	3	4	3
BN1106_s219B000274	Glucan (1,4-alpha-), branching enzyme 1;Putative starch branching enzyme II	46 kDa	3	3	5
BN1106_s4735B000109	Eukaryotic release factor 3-related (Erfs) (Hbs1-like);Elongation factor 1 alpha-like protein	39 kDa	3	3	3
BN1106_s6478B000075	GTP-binding protein;GTP-binding protein-related;GTP-binding protein-related K06942	37 kDa	3	3	4
BN1106_s1670B000173	Uncharacterized protein	21 kDa	3	3	5
BN1106_s5586B000057	Eukaryotic release factor 1;Eukaryotic peptide chain release factor subunit,putative	44 kDa	3	3	4
BN1106_s841B000213	NADH dehydrogenase (Ubiquinone) 1 beta subcomplex 11;	19 kDa	3	6	3
BN1106_s2506B000124	Dipeptidyl-peptidase 9 (S09 family);Dipeptidyl-peptidase 9;	34 kDa	3	3	4
BN1106_s3865B000066	Actin-like protein 2;Actin-related protein 2, arp2	13 kDa	3	3	3
BN1106_s3161B000095	Protein phosphatase 1 regulatory subunit 7;Sds	21 kDa	3	3	3
BN1106_s6381B000088	Putative ribosomal protein S13	17 kDa	3	4	4
BN1106_s86B000856	Alpha subunit of casein kinase II;Protein kinase;Casein kinase II subunit alpha	41 kDa	3	3	5
BN1106_s14528B000008	uncharacterised	17 kDa	3	3	3
BN1106_s4138B000068	Apolipoprotein AI binding protein;N-terminal yjef related;YjeF N-terminal domain-containing protein GK25285	28 kDa	3	3	3
BN1106_s6797B000034	Malate dehydrogenase (EC 1.1.1.37)	20 kDa	3	3	3
BN1106_s5172B000090	uncharacterised	57 kDa	3	3	3
BN1106_s3938B000089	Large subunit ribosomal protein L7e;60S ribosomal protein L7, putative	38 kDa	3	3	3
BN1106_s4329B000099	Putative 40S ribosomal protein RPS15A;Ribosomal protein S15Aa;Putative 30s ribosomal protein S8	15 kDa	3	4	3
BN1106_s2169B000108	Putative mitochondrial ATP synthase F chain;ATP synthase f chain, mitochondrial-related	13 kDa	3	4	4
BN1106_s7139B000053	NADH-ubiquinone oxidoreductase mitochondrial, putative;NADH dehydrogenase (Ubiquinone) Fe-S protein 3	25 kDa	3	4	4
BN1106_s1240B000275	Glycerol-3-phosphate dehydrogenase;	24 kDa	3	3	3
BN1106_s5525B000050	Phosphatidylinositol 4-kinase alpha, putative;Phosphatidylinositol 4-kinase alpha	62 kDa	3	4	3
BN1106_s677B000496	Zinc finger CDGSH domain-containing protein 1;CDGSH iron-sulfur domain-containing protein	16 kDa	3	4	4
BN1106_s999B000190	Protein FAM82B;Regulator of microtubule dynamics protein 1	23 kDa	3	3	3
BN1106_s755B000302	Uncharacterized protein	11 kDa	3	4	3
BN1106_s864B000152	Twinfilin, actin-binding protein, homolog 1;Putative twinfilin;PTK9 protein tyrosine kinase 9	?	3	3	3
BN1106_s1115B000505	Putative 60S ribosomal protein L23;Large subunit ribosomal protein L23e	14 kDa	3	3	3
BN1106_s18286B000012	RAB family;	19 kDa	3	3	3
BN1106_s7307B000022	Uncharacterized protein	75 kDa	3	3	3
BN1106_s8882B000039	;Uncharacterized protein;	16 kDa	3	3	4
BN1106_s18766B000003	GTP-binding protein ypt1;Putative small GTP-binding protein (Rab1b);Putative rab1	6 kDa	3	3	3
BN1106_s2298B000195	Putative Vesicle-associated membrane protein-associated protein A;Putative vesicle-associated membrane protein (Vamp)	36 kDa	7	2	7
BN1106_s3032B000154	Cell cycle control protein 50A (Transmembrane protein 30A);Cdc50-related	39 kDa	7	4	2
BN1106_s5858B000060	Proteasome (Prosome, macropain) 26S subunit, ATPase 2;26S proteasome regulatory subunit T1	45 kDa	7	2	6
BN1106_s1545B000245	Tropomyosin-1, isoforms 9A/A/B;Tropomyosin, putative	24 kDa	7	2	5
BN1106_s4663B000094	26S proteasome regulatory subunit N1;26S proteasome regulatory subunit N9;	31 kDa	7	2	6
BN1106_s5304B000039	Protein KINase;Protein kinase;Casein kinase 1 alpha;	41 kDa	7	2	5
BN1106_s112B001250	Titin, putative;Rab effector MyRIP	93 kDa	6	2	5
BN1106_s1183B000225	26S proteasome regulatory subunit S3, putative;26S proteasome regulatory subunit N3	56 kDa	6	2	7
BN1106_s1923B000205	Putative sec15;Exocyst complex component 6B;	102 kDa	6	2	3
BN1106_s1384B000271	Tubulin gamma chain	58 kDa	6	2	3
BN1106_s382B000361	Tryptophanyl-tRNA synthetase;Putative tryptophanyl-tRNA synthetase	14 kDa	6	2	4
BN1106_s747B000211	Uncharacterized protein	226 kDa	5	2	6
BN1106_s380B000255	Protein kinase C, brain isozyme;Calcium-dependent protein kinase C	67 kDa	5	2	4
BN1106_s1368B000185	Putative beta-arrestin;Putative beta-arrestin 1	38 kDa	5	2	5
BN1106_s969B000458	Protein farnesyltransferase/ geranylgeranyltransferase type-1 subunit alpha	51 kDa	5	2	4
BN1106_s335B000432	Protein FAM125B;Uncharacterized protein	17 kDa	5	2	4
BN1106_s1118B000186	Putative eukaryotictranslation initiation factor 3 subunit	61 kDa	5	2	7
BN1106_s307B000270	Ng-dimethylarginine dimethylaminohydrolase;Dimethylargininase	27 kDa	5	2	4
BN1106_s4504B000167	Aldose 1-epimerase	42 kDa	5	4	2
BN1106_s352B000509	26S proteasome regulatory subunit S3, putative;COP9 signalosome complex subunit 3	21 kDa	5	2	3
BN1106_s5145B000119	Uncharacterized protein	88 kDa	4	2	6
BN1106_s6241B000014	Peptidyl-prolyl cis-trans isomerase	12 kDa	4	2	3
BN1106_s3350B000060	Putative phosphatidylinositol-4-phosphate 5-kinase, type I, alpha;26s proteasome non-atpase regulatory subunit 4 (26s proteasomeregulatory subunit s5a);Multiubiquitin binding protein S5a	45 kDa	4	2	6
BN1106_s2716B000103	Dehydrogenase/reductase SDR family member 1	40 kDa	4	5	2
BN1106_s1285B000160	ESCRT-II complex subunit VPS36;Vacuolar protein sorting 36 (Yeast)	50 kDa	4	2	6
BN1106_s4999B000041	Uncharacterized protein;Protein disulfide isomerase	55 kDa	4	2	3
BN1106_s152B000580	P53 regulated pa26 nuclear protein sestrin, putative;Putative p53 regulated pa26 nuclear protein sestrin	73 kDa	4	2	4
BN1106_s3177B000093	Histidine triad nucleotide binding protein 1;Histidine triad nucleotide-binding protein 2 mitochondrial	14 kDa	4	3	2
BN1106_s6673B000016	Nuclear protein localization, putative;Nuclear protein localization protein 4-like protein	20 kDa	4	2	4
BN1106_s382B000362	MON2 like protein;Uncharacterized protein	66 kDa	4	2	4
BN1106_s7794B000034	Biotin-protein ligase;Biotin--protein ligase	25 kDa	4	2	5
BN1106_s5287B000016	Multidrug resistance protein 1, 2, 3 (P glycoprotein 1, 2, 3), putative;ATP-binding cassette subfamily B (MDR/TAP) member 1;	30 kDa	4	3	2
BN1106_s720B000129	NAD+ nucleosidase;SARC	39 kDa	4	2	3
BN1106_s2459B000263	Ester hydrolase C11orf54 homolog;Ester hydrolase C11orf54-like protein	19 kDa	4	2	4
BN1106_s5179B000059	Putative cofactor A protein;	13 kDa	4	3	2
BN1106_s9372B000026	Casein kinase I isoform alpha;Kinase;Casein kinase 1 alpha	19 kDa	4	2	4
BN1106_s332B000232	Adenosylhomocysteinase,putative	41 kDa	4	2	4
BN1106_s92B000559	TBC1 domain family member 20;TBC1 domain family;T-cell immunomodulatory protein	53 kDa	4	2	3
BN1106_s1071B000108	Ubiquitin fusion degradation protein 1 homolog;Putative ubiquitin fusion degradaton protein	23 kDa	4	2	3
BN1106_s5291B000044	Programmed cell death protein 10;	24 kDa	4	3	2
BN1106_s192B000400	SNF1A/AMP-activated protein kinase;Serine/threonine kinase;5'-AMP-activated protein kinase catalytic subunit alpha-2	19 kDa	4	2	3
BN1106_s746B000286	Trafficking protein particle complex subunit 6B;Putative rab15, 13, 10, 1, 35, 5, and;	?	4	2	4
BN1106_s995B000145	Protein MEMO1;Uncharacterized protein	31 kDa	3	2	5
BN1106_s2597B000195	Snf7-related;Charged multivesicular body protein 4;Charged multivesicular body protein 4b	43 kDa	3	2	3
BN1106_s2638B000130	Palmitoyltransferase (EC 2.3.1.225)	31 kDa	3	2	3
BN1106_s426B000260	Tegumental protein;Tegument antigen;Antigen Sm21.7;	10 kDa	3	2	2
BN1106_s941B000324	Sorcin;Putative programmed cell death protein;	17 kDa	3	2	3
BN1106_s4036B000192	;SLIT-ROBO Rho GTPase activating protein;Uncharacterized protein	144 kDa	3	2	3
BN1106_s1251B000301	Uncharacterized protein	28 kDa	3	2	3
BN1106_s45B000421	histone H2A;	40 kDa	3	2	3
BN1106_s1891B000137	Serine/threonine kinase;Rho-associated kinase;	38 kDa	3	2	3
BN1106_s785B000163	Endoglycoceramidase;	57 kDa	3	2	3
BN1106_s2878B000058	Venom allergen-like protein 8;GLIPR1-like protein 1;Venom allergen-like (VAL) 8 protein	21 kDa	3	3	2
BN1106_s1582B000149	Putative dynein light chain;Dynein light chain LC6 flagellar outer arm;T-cell-stimulating antigen	10 kDa	3	2	2
BN1106_s5156B000132	Eukaryotic translation initiation factor 2c,putative;Protein argonaute-2;Ago3;Ago2;	94 kDa	3	3	2
BN1106_s4385B000040	tRNA-splicing ligase RtcB homolog (EC 6.5.1.3)	29 kDa	3	2	3
BN1106_s2815B000111	Solute carrier family 2, facilitated glucose transporter member 5;Solute carrier family 2 facilitated glucose transporter member 3;Glucose transporter TGTP2	43 kDa	3	3	2
BN1106_s11067B000018	Translation machinery-associated protein, putative;Putative beta-1,4-galactosyltransferase;Putative rna-binding protein;Malignant T cell amplified sequence 1	10 kDa	3	3	2
BN1106_s5544B000084	Hormone-sensitive lipase (S09 family);Hormone-sensitive lipase	99 kDa	3	2	5
BN1106_s1076B000663	Uncharacterized protein	52 kDa	3	2	2
BN1106_s1185B000341	Inositol polyphosphate-4-phosphatase	97 kDa	3	5	2
BN1106_s347B000346	Programmed cell death, putative;Programmed cell death protein 4	59 kDa	3	2	3
BN1106_s7787B000022	T-complex protein 1 subunit delta (Fragment)	22 kDa	3	2	4
BN1106_s1396B000332	Metallo-beta-lactamase domain-containing protein 1	53 kDa	3	2	4
BN1106_s3036B000185	Asparaginyl-tRNA synthetase;Aspartyl-tRNA synthetase, putative	34 kDa	3	2	7
BN1106_s183B000177	Speckle-type POZ protein-like	39 kDa	3	2	5
BN1106_s761B000167	RuvB-like protein 2;Ruvb-related reptin and pontin	37 kDa	3	2	6
BN1106_s2673B000071	Calreticulin;Calreticulin autoantigen homolog,putative	49 kDa	3	2	5
BN1106_s8959B000028	Lethal (3) neo18;NADH-ubiquinone oxidoreductase sgdh subunit,putative;NADH dehydrogenase (Ubiquinone) 1 beta subcomplex 5;NADH-ubiquinone oxidoreductase	28 kDa	3	2	3
BN1106_s149B000356	Uncharacterized protein	28 kDa	3	2	3
BN1106_s2329B000134	Actin-related protein;Arp2/3 complex subunit 41-related;Suppressor of profilin 2;Actin related protein 2/3 complex subunit 1A/1B	12 kDa	3	2	2
BN1106_s2574B000116	Diazepam-binding inhibitor;Diazepam binding inhibitor, putative	9 kDa	3	2	3
BN1106_s2638B000129	Palmitoyltransferase (EC 2.3.1.225)	15 kDa	3	2	2
BN1106_s3414B000105	Hypotherical protein;ADP-ribosylation factor-like 2, arl2;ADP-ribosylation factor-like 2	15 kDa	3	2	5
BN1106_s1806B000294	uncharacterised	9 kDa	3	2	2
BN1106_s6033B000047	Putative lipoxygenase;Arachidonate 5-lipoxygenase	20 kDa	3	2	2
BN1106_s1073B000173	Serine/threonine kinase;p21-activated kinase 1;P21 activated kinase-1;	81 kDa	3	2	3
BN1106_s1799B000086	;Ubiquitin-conjugating enzyme E2;Ubiquitin-conjugating enzyme H5b	17 kDa	3	2	3
BN1106_s1378B000218	;Putative Brain protein 44-like	8 kDa	3	3	2
BN1106_s649B000495	Putative hect E3 ubiquitin ligase;E3 ubiquitin-protein ligase HERC4	22 kDa	3	2	4
BN1106_s768B000175	Putative DEAD box ATP-dependent RNA helicase;ATP-dependent RNA helicase DDX1	31 kDa	3	3	2
BN1106_s173B000874	Vacuolar ATP synthase subunit G, putative;Centromere protein S;ATPase, H+ transporting, lysosomal 13kDa, V1 subunit G1	14 kDa	3	4	2
BN1106_s1783B000132	Myosin-2	37 kDa	3	2	2
BN1106_s5153B000062	Protein kinase;STE20-like serine/threonine-protein kinase;LOK-like protein kinase	30 kDa	3	2	2
BN1106_s263B000604	uncharacterised	11 kDa	3	3	2
BN1106_s748B000263	Eukaryotic translation initiation factor 3, subunit 8;Carbohydrate kinase domain-containing protein	33 kDa	3	2	3
BN1106_s1074B000200	uncharacterised	12 kDa	3	2	3
BN1106_s1684B000345	Holocarboxylase synthetase;Biotin-protein ligase;Biotin--protein ligase	17 kDa	3	2	3
BN1106_s3900B000173	Putative wd-repeat protein;WD repeat and FYVE domain-containing protein 2	57 kDa	3	2	5
BN1106_s2305B000107	GE16630;Ring-box 1;Ring box protein	22 kDa	3	2	2
BN1106_s8741B000057	6-pyruvoyl tetrahydrobiopterin synthase	16 kDa	3	2	3
BN1106_s1731B000201	Dynein light chain roadblock-type;Dynein light chain, putative;Roadblock-related dynein light chain-like protein	10 kDa	3	2	2
BN1106_s2704B000207	Peptidyl-prolyl cis-trans isomerase NIMA-interacting 1;Uncharacterized protein	29 kDa	3	2	3
BN1106_s4997B000094	Putative udp-glucose pyrophosphatase;UDP-sugar diphosphatase	23 kDa	3	2	3
BN1106_s3899B000092	STE20-like serine/threonine-protein kinase	25 kDa	3	2	3
BN1106_s602B000099	p25-alpha domain containing protein;Tubulin polymerization-promoting protein family member 2	?	3	3	2
BN1106_s3049B000124	Cytoplasmic dynein 1 intermediate chain, putative;Putative cytoplasmic dynein intermediate chain 2, (Dhic-2)	21 kDa	3	2	2
BN1106_s2545B000158	Ras-related protein Rap-1A;Putative gtp-binding protein rit;Ras-related protein M-Ras;	17 kDa	3	2	2
BN1106_s1596B000265	Phosphodiesterase-nucleotide pyrophosphatase;Ectonucleotide pyrophosphatase/phosphodiesterase family member 5	39 kDa	3	2	5
BN1106_s1748B000162	Uncharacterized protein;	13 kDa	3	2	3
BN1106_s1307B000311	;Bcl2-associated athanogene, putative;Bcl2-associated athanogene	19 kDa	3	2	2
BN1106_s5230B000038	Putative 60s ribosomal protein L12	18 kDa	3	2	3
BN1106_s2052B000268	Casein kinase 1 alpha;Casein kinase I isoform alpha	48 kDa	3	2	2
BN1106_s1208B000135	Putative alpha-actinin;Actinin alpha;Alpha-actinin, sarcomeric	54 kDa	2	2	2
BN1106_s8B000463	Cyclin-dependent kinase-like;	698 kDa	2	63	6
BN1106_s2825B000206	Uncharacterized protein;	105 kDa	2	20	5
BN1106_s7521B000031	Saposin-like protein;FHAP protein;SAP-2;SAP-1;Amoebapore-like protein	8 kDa	2	2	2
BN1106_s5701B000008	Cathepsin L, a;Cathepsin M;Cystein proteinase inhibitor protein	24 kDa	2	5	5
BN1106_s214B000748	Tegumental antigen;22.4 kDa tegument protein	20 kDa	2	4	3
BN1106_s8462B000006	Cathepsin B	14 kDa	2	3	3
BN1106_s2916B000225	Transmembrane protein C2orf18;Transmembrane protein C2orf18-like protein	61 kDa	2	2	2
BN1106_s913B000263	AQP-2;AQP-1;;Aquaporin-1	33 kDa	2	3	6
BN1106_s1B000533	High-affinity cationic amino acid transporter 1;Solute carrier family 7 member 1	36 kDa	2	4	4
BN1106_s1869B000302	Putative importin beta-1;Importin subunit beta-1;Putative karyopherin importin beta 1;	101 kDa	2	8	7
BN1106_s551B000322	Uncharacterized protein	37 kDa	2	6	4
BN1106_s726B000468	Uncharacterized protein	30 kDa	2	7	2
BN1106_s1017B000214	Uncharacterized protein	?	2	8	9
BN1106_s3516B000081	Eukaryotic translation initiation factor 3 subunit 10;Eukaryotic initiation factor-3A	117 kDa	2	2	5
BN1106_s2227B000067	Uncharacterized protein;	36 kDa	2	2	2
BN1106_s2369B000078	Uncharacterized protein	20 kDa	2	6	5
BN1106_s299B000382	Serine/threonine kinase 25;	69 kDa	2	2	3
BN1106_s2318B000214	Microtubule associated-protein orbit, putative;Putative clasp2 protein;CLIP-associating protein 1	87 kDa	2	3	2
BN1106_s573B000237	Multidrug resistance-associated protein 1;Putative multidrug resistance protein 1 (ATP-binding cassette C1)	19 kDa	2	3	4
BN1106_s6578B000029	uncharacterised	21 kDa	2	4	3
BN1106_s2679B000113	Putative N-myristoyltransferase NMT	56 kDa	2	2	4
BN1106_s434B000521	Serine/threonine kinase;Serine/threonine-protein kinase SRPK2	128 kDa	2	2	3
BN1106_s5070B000092	Uncharacterized protein	14 kDa	2	4	3
BN1106_s8630B000032	Rab-protein 8;Putative rab15, 13, 10, 1, 35, 5, and;Ras-related protein RABD2a	7 kDa	2	2	2
BN1106_s1797B000133	Putative Family with sequence similarity 98, member A;Protein FAM98A	55 kDa	2	2	4
BN1106_s3915B000075	Protein VAC14 homolog;Uncharacterized protein	102 kDa	2	5	4
BN1106_s6581B000070	Uncharacterized protein;NADH ubiquinone oxidoreductase B15	?	2	5	5
BN1106_s1377B000255	Uncharacterized protein	46 kDa	2	5	2
BN1106_s1304B000099	Stomatin-like protein 2;Stomatin (EPB72)-like 2	31 kDa	2	7	4
BN1106_s3393B000047	Putative vinculin;Vinculin	88 kDa	2	2	6
BN1106_s7879B000034	Glucose-6-phosphate isomerase (EC 5.3.1.9)	20 kDa	2	2	3
BN1106_s2582B000094	Uncharacterized protein	55 kDa	2	2	5
BN1106_s3994B000077	Fructose-1,6-bisphosphatase;Fructose-1,6-bisphosphatase-related	18 kDa	2	2	2
BN1106_s1161B000189	Mitochondrial ATP synthase B subunit;ATP synthase, subunit b;F-type H+-transporting ATPase subunit b	34 kDa	2	8	4
BN1106_s4666B000062	von Willebrand factor A domain-containing protein 5A	18 kDa	2	2	2
BN1106_s4828B000104	Cornifelin	8 kDa	2	2	2
BN1106_s743B000081	Protein kinase A;Protein kinase, cAMP-dependent, catalytic, beta;Protein kinase cAMP-dependent catalytic beta	41 kDa	2	6	4
BN1106_s2830B000084	Chloride channel protein 7;Putative chloride channel protein;H(+)/Cl(-) exchange transporter 7	95 kDa	2	4	3
BN1106_s2959B000391	Exocyst complex component 5	82 kDa	2	3	4
BN1106_s32B000337	Cytochrome b-c1 complex subunit Rieske, mitochondrial (EC 1.10.2.2)	30 kDa	2	4	3
BN1106_s1199B000307	Protein phosphatase regulatory subunit, putative;Probable serine/threonine-protein phosphatase PP2A regulatory subunit	24 kDa	2	2	2
BN1106_s2270B000079	Uncharacterized protein;HEAT repeat-containing protein 2	84 kDa	2	4	4
BN1106_s3721B000192	Permease 1 heavy chain;Alpha-glucosidase;Putative alpha-amylase;Neutral and basic amino acid transport protein rBAT	72 kDa	2	7	3
BN1106_s6922B000040	Proteasome subunit beta type (EC 3.4.25.1)	17 kDa	2	2	4
BN1106_s274B000299	Protein phosphatase PP2A regulatory subunit B;	41 kDa	2	2	4
BN1106_s5500B000138	Superoxide dismutase (EC 1.15.1.1)	25 kDa	2	2	3
BN1106_s2101B000084	Helminth defence molecule-1;MF6p protein	?	2	2	3
BN1106_s4126B000096	ATPase, H+ transporting, lysosomal 34kDa, V1 subunit D;Putative atp synthase subunit d	28 kDa	2	2	3
BN1106_s3479B000078	Uncharacterized protein	20 kDa	2	3	2
BN1106_s2288B000174	Isoleucine--tRNA ligase;Isoleucyl-tRNA synthetase	117 kDa	2	3	4
BN1106_s638B000318	Putative alcohol dehydrogenase;Alcohol dehydrogenase class-3	36 kDa	2	3	3
BN1106_s271B000508	Putative cortactin;Putative drebrin;Cortactin isoform C;Cortactin isoform B	45 kDa	2	2	3
BN1106_s58B000489	Putative cyln2 (Cytoplasmic linker protein-115) (Clip-115);CAP-gly domain-containing linker protein 1	26 kDa	2	2	2
BN1106_s7456B000012	Cathepsin L1	25 kDa	2	3	3
BN1106_s2372B000134	Putative ubiquitin-conjugating enzyme E2 I;Ubc9	19 kDa	2	2	4
BN1106_s3859B000158	Defective in cullin neddylation protein	27 kDa	2	4	3
BN1106_s6373B000054	Beta-parvin-related;Alpha-parvin	53 kDa	2	2	3
BN1106_s1024B000339	histone deacetylase,putative;histone deacetylase 6/10	79 kDa	2	2	2
BN1106_s948B000119	Regulator of chromosome condensation, RCC1,domain-containing protein;Sepiapterin reductase	37 kDa	2	2	2
BN1106_s2879B000107	uncharacterised	14 kDa	2	2	2
BN1106_s4443B000074	Putative basic transcription factor 3-like 4;Putative transcription factor btf3;RNA polymerase B transcription factor 3	?	2	2	2
BN1106_s3581B000070	Cytochrome c oxidase subunit XV assembly protein	34 kDa	2	3	2
BN1106_s6082B000080	Cytochrome b-561	29 kDa	2	4	3
BN1106_s4986B000028	Saposin-like protein;FHAP protein;SAP-1;Amoebapore-like protein	?	2	2	3
BN1106_s1643B000113	Phosphoinositol 4-phosphate adaptor protein,putative;Pleckstrin-like protein domain-containing family A member 8	54 kDa	2	2	2
BN1106_s19B000337	Tropomodulin;Putative tropomodulin	16 kDa	2	2	2
BN1106_s1021B000157	Ubiquitin carboxyl-terminal hydrolase 2	68 kDa	2	2	2
BN1106_s445B000223	Protein-L-isoaspartate O-methyltransferase (EC 2.1.1.77)	22 kDa	2	2	2
BN1106_s1B000534	Putative cationic amino acid transporter;High affinity cationic amino acid transporter 1	11 kDa	2	2	2
BN1106_s3284B000134	Protein phosphatase 2 (Formerly 2A) regulatory subunit B;Putative serine/threonine protein phosphatase 2a regulatory subunit	26 kDa	2	2	3
BN1106_s1747B000212	Putative vacuolar membrane protein pep11;Vacuolar protein sorting-associated protein 11 homolog	88 kDa	2	3	2
BN1106_s4020B000073	Growth factor receptor-bound protein 2;Putative growth factor receptor-bound protein;Growth factor receptor-bound protein 2-A	20 kDa	2	2	2
BN1106_s2977B000053	uncharacterised	11 kDa	2	4	4
BN1106_s784B000192	Neurotracting/lsamp/neurotrimin/obcam related cell adhesion molecule;Active breakpoint cluster region-related protein	31 kDa	2	3	3
BN1106_s401B000237	Ribosomal protein S5a;Putative 40s ribosomal protein S5	22 kDa	2	2	2
BN1106_s1765B000233	Uncharacterized protein	41 kDa	2	2	2
BN1106_s4777B000205	ATP-binding cassette sub-family G member 2;ATP-binding cassette transporter subfamily G member 2a	51 kDa	2	2	2
BN1106_s764B000136	Putative marvel-containing potential lipid raft-associated protein;Marvel-containing potential lipid raft-associated protein	21 kDa	2	2	2
BN1106_s789B000473	Uncharacterized protein	39 kDa	2	2	2
BN1106_s12550B000010	Proteasome subunit alpha type (EC 3.4.25.1)	7 kDa	2	2	2
BN1106_s9340B000034	Cell polarity protein;MAGUK p55 subfamily member 5	18 kDa	2	3	3
BN1106_s2206B000090	Glyceraldehyde 3-phosphate dehydrogenase;Putative dna repair protein xp-E;DNA damage-binding protein 1	95 kDa	2	3	3
BN1106_s5358B000083	Putative prohibitin;Prohibitin-2 (B-cell receptor-associated protein BAP37);Prohibitin-2	15 kDa	2	3	3
BN1106_s346B000282	Ribosomal protein L11;60S ribosomal protein l11;Putative 60s ribosomal protein L11	21 kDa	2	2	3
BN1106_s4296B000096	Acylphosphatase 2, muscle type	12 kDa	2	2	2
BN1106_s9050B000016	Proteasome subunit alpha type (EC 3.4.25.1)	12 kDa	2	2	2
BN1106_s3127B000196	NADH dehydrogenase (Ubiquinone) 1 alpha subcomplex 13;Cell death-regulatory protein GRIM19;Putative mitochondrial electron transport	15 kDa	2	5	3
BN1106_s1280B000185	Voltage-dependent anion-selective channel protein 1;Putative voltage-dependent anion-selective channel;Voltage-dependent anion channel protein 2	19 kDa	2	3	3
BN1106_s982B000290	NADH dehydrogenase (Ubiquinone) Fe-S protein 1;NADH-ubiquinone oxidoreductase, putative	22 kDa	2	6	3
BN1106_s7578B000036	uncharacterised	21 kDa	2	2	2
BN1106_s1974B000293	Neuronal acetylcholine receptor subunit alpha-2;Septate junction protein	44 kDa	2	2	2
BN1106_s4052B000063	uncharacterised	14 kDa	2	2	2
BN1106_s1292B000096	uncharacterised	?	2	2	2
BN1106_s1535B000218	Putative cullin;Cullin-5-like protein	37 kDa	2	2	2
BN1106_s4216B000102	Protein phosphatase 3, regulatory subunit;Putative calcineurin B;Protein phosphatase 3 regulatory subunit;Calcineurin B	21 kDa	2	2	2
BN1106_s63B000399	DIF_5;Uncharacterized protein	?	2	2	2
BN1106_s749B000102	Protein kinase, cAMP-dependent, catalytic, beta;Protein kinase cAMP-dependent catalytic beta	23 kDa	2	3	2
BN1106_s3381B000140	Uncharacterized protein	?	2	3	2
BN1106_s7417B000062	Pre-mRNA-processing-splicing factor 8;MACRO domain-containing protein 2	22 kDa	2	2	3
BN1106_s8381B000040	Putative ffa transport protein;Solute carrier family 27 (Fatty acid transporter) member 1/4	24 kDa	2	3	3
BN1106_s1312B000097	Uncharacterized protein;Putative zinc finger protein;Zinc finger protein ZPR1	40 kDa	2	2	2
BN1106_s8272B000020	Dynactin 6	16 kDa	2	2	2
BN1106_s8266B000029	Hypotheticial protein	9 kDa	2	2	2
BN1106_s12573B000006	GTPase_rho;GTPase Rho, putative;Transforming protein RhoA	6 kDa	2	3	2
BN1106_s1972B000195	NADH dehydrogenase [ubiquinone] 1 alpha subcomplex subunit 6;Putative nadh dehydrogenase	15 kDa	2	3	3
BN1106_s1214B000318	Membrane-associated phosphatidylinositol transfer protein 1;Phosphatidylinositol transfer protein	24 kDa	2	2	2
BN1106_s936B000177	Putative phospholipase DDHD1;Putative 60s ribosomal protein L7a	28 kDa	2	2	2
BN1106_s1110B000105	uncharacterised	30 kDa	2	2	2
BN1106_s3899B000093	Casein kinase 2, beta polypeptide;Putative casein kinase II beta subunit;Casein kinase II beta subunit	13 kDa	2	2	2
BN1106_s414B000246	Probable calcium-binding protein CML26;Calmodulin;16 kDa calcium-binding protein	16 kDa	2	3	4
BN1106_s914B000124	Small subunit ribosomal protein S20e;40S rRNA protein homolog;40S ribosomal protein S20-like protein	13 kDa	2	2	2
BN1106_s410B000441	Putative hemicentin;Titin	20 kDa	2	2	2
BN1106_s48B000386	Small subunit ribosomal protein S27e;Putative 40s ribosomal protein S27	12 kDa	2	2	2
BN1106_s2778B000108	Serine/threonine-protein phosphatase PP1	17 kDa	2	2	2
BN1106_s6083B000078	Putative succinyl-CoA synthetase beta chain;Succinyl-CoA ligase [GDP-forming] subunit beta, mitochondrial	11 kDa	2	2	3
BN1106_s11672B000010	Prohibitin-2 (B-cell receptor-associated protein BAP37);Putative prohibitin;Prohibitin-2	15 kDa	2	3	2
BN1106_s11788B000014	Sorting nexin-12;Putative sorting nexin;Sorting nexin-3	8 kDa	2	2	2
BN1106_s1026B000539	Ribosomal protein S10;Putative 40s ribosomal protein S10;40S ribosomal protein S10;	17 kDa	2	2	2
BN1106_s2480B000193	uncharacterised	9 kDa	2	2	2
BN1106_s5594B000074	Uncharacterized protein	15 kDa	2	2	2
